# Supplementary figures and images for: Palladium(ii)/N-heterocyclic carbene (NHC) catalyzed direct C–H arylation of heteroarenes with different aryl bromides and chlorides
Source: Royal Society of Chemistry journal article supplement (doi:10.1039/d3nj04209j), 2023-01-01

2a

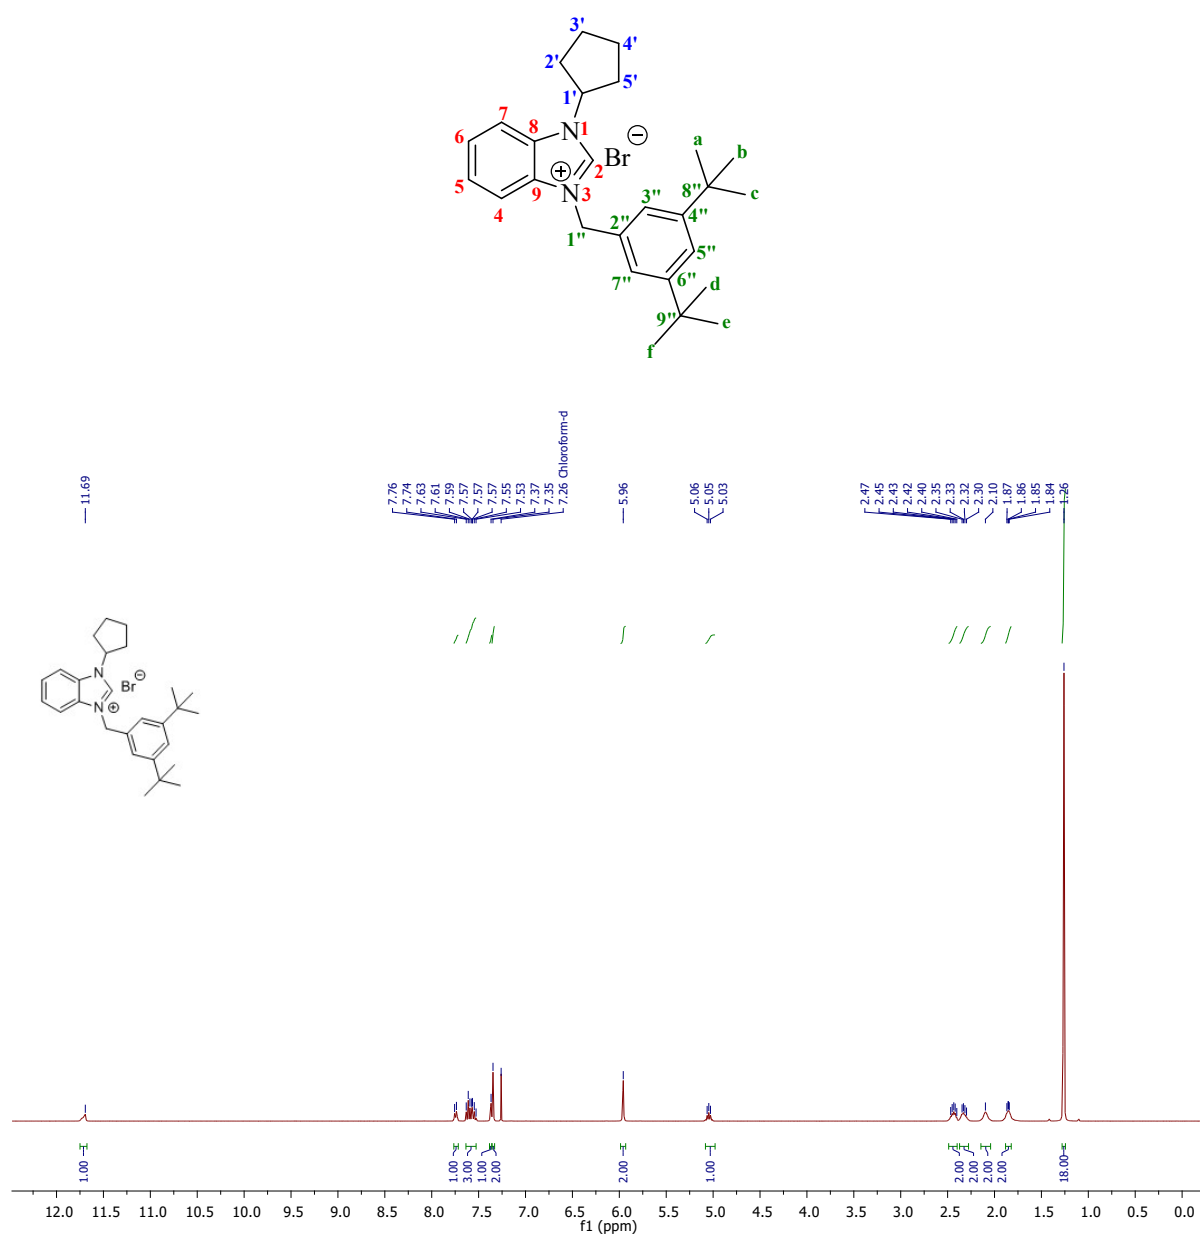

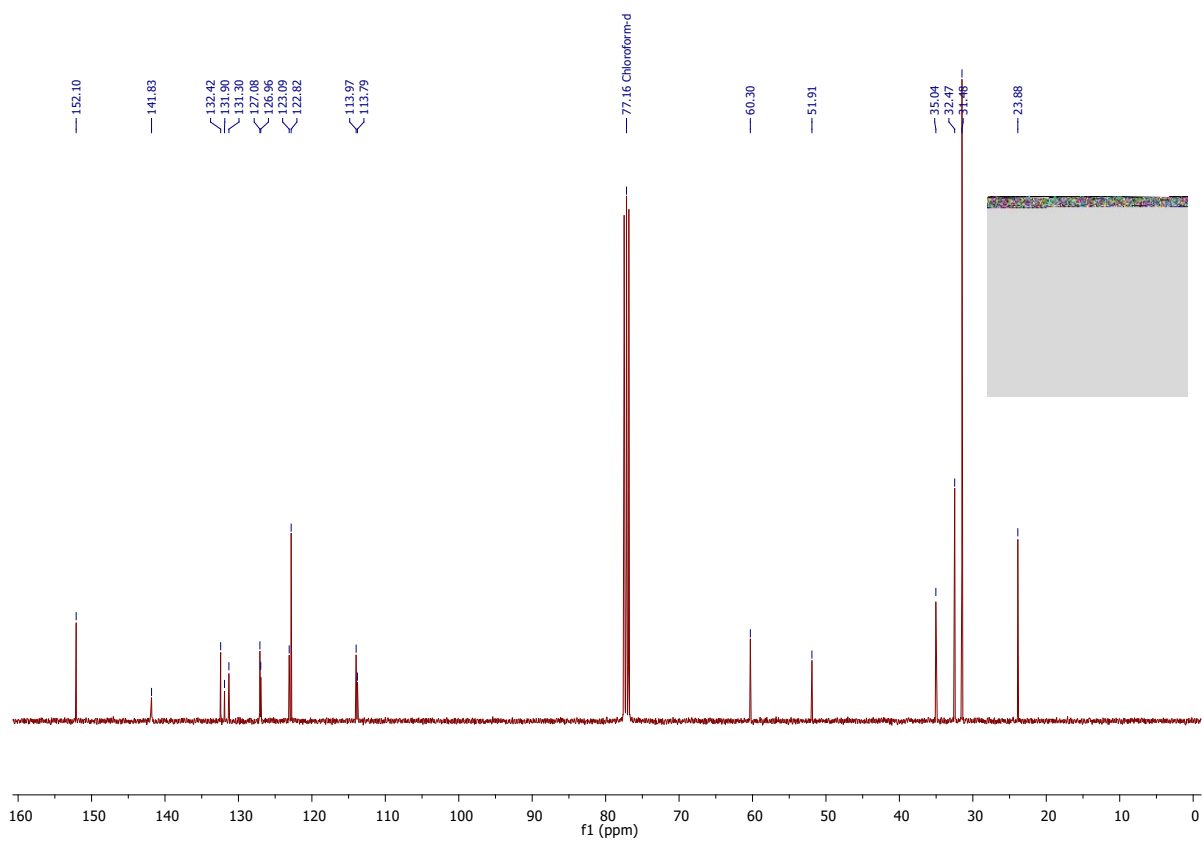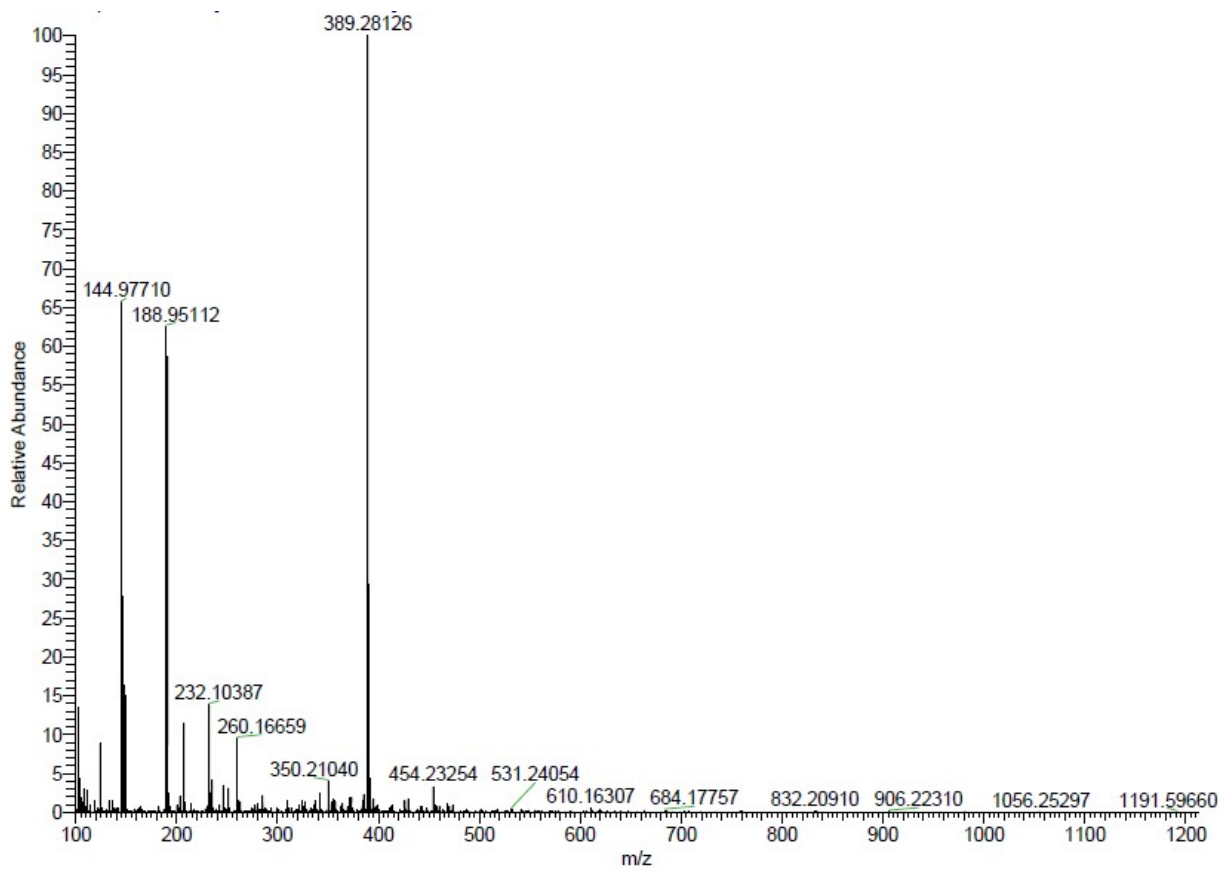

2b

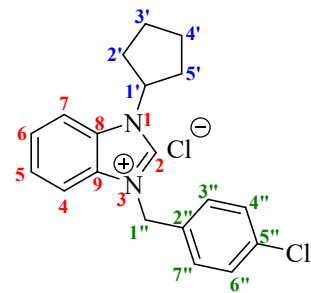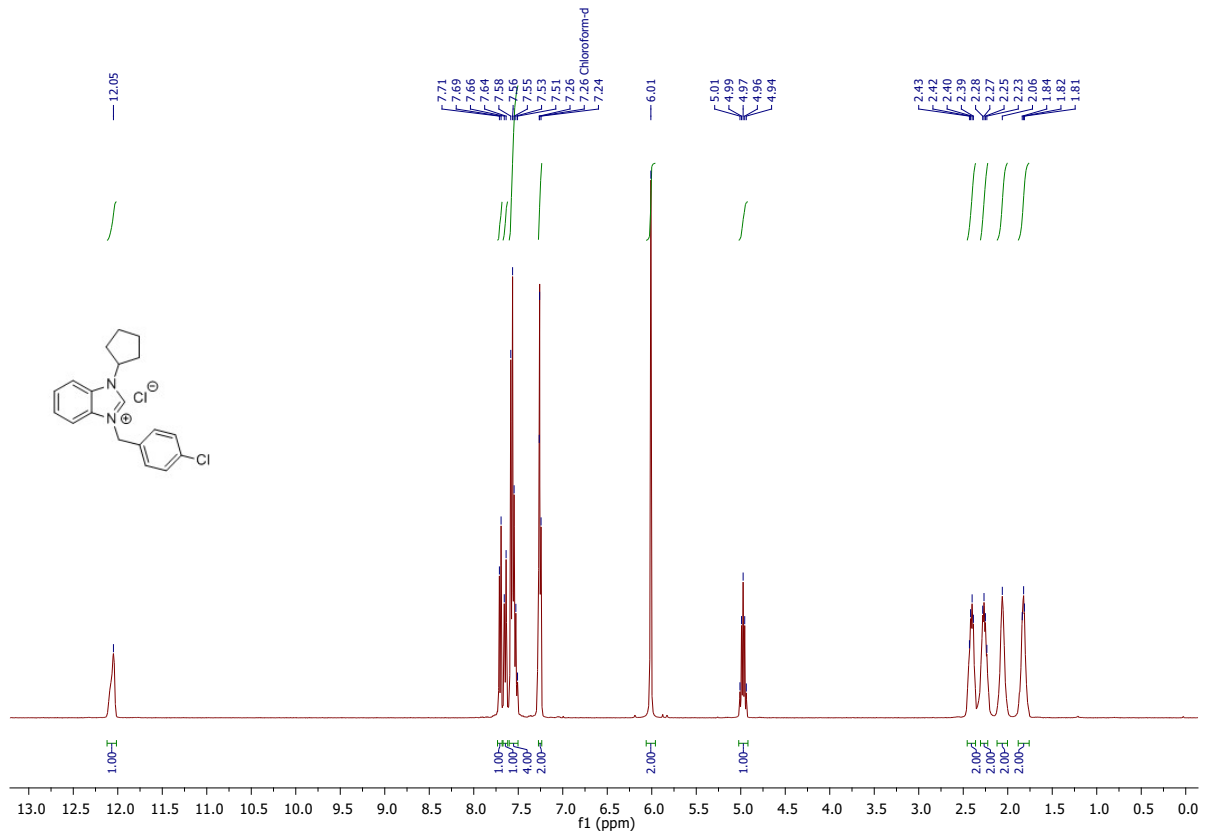

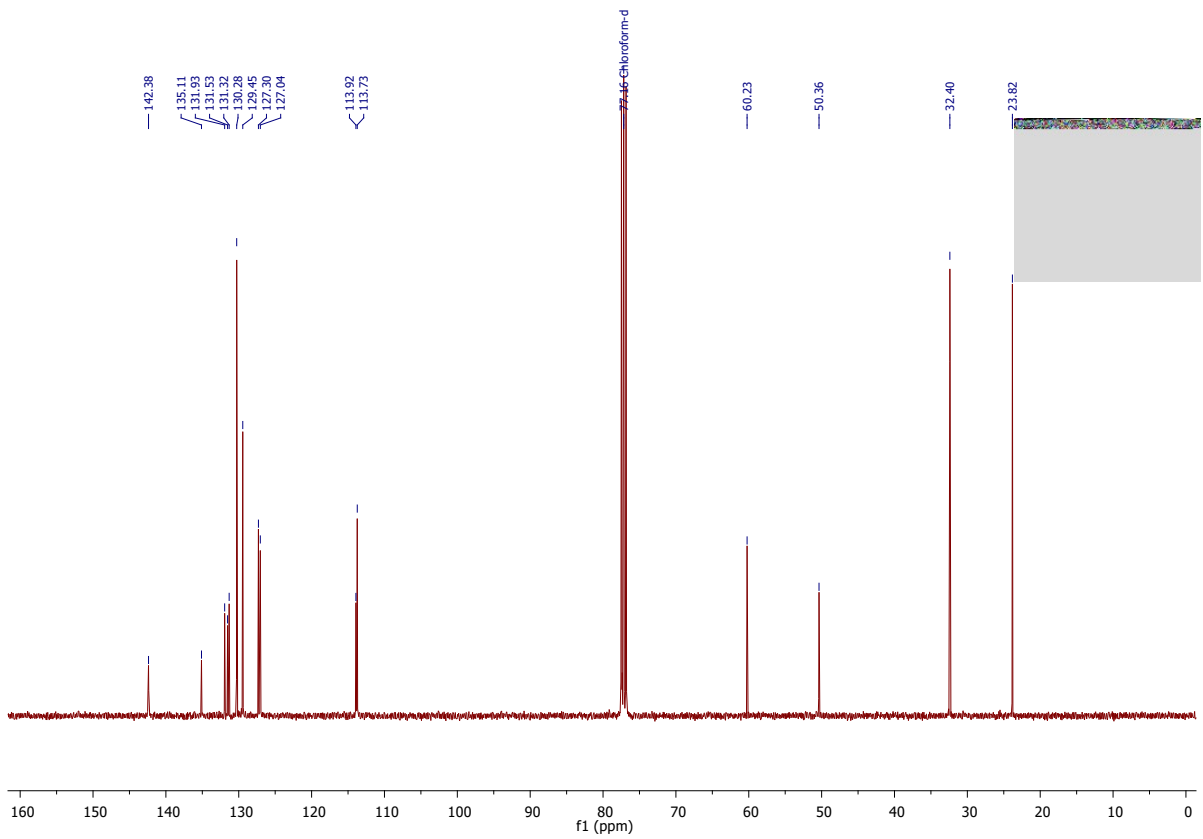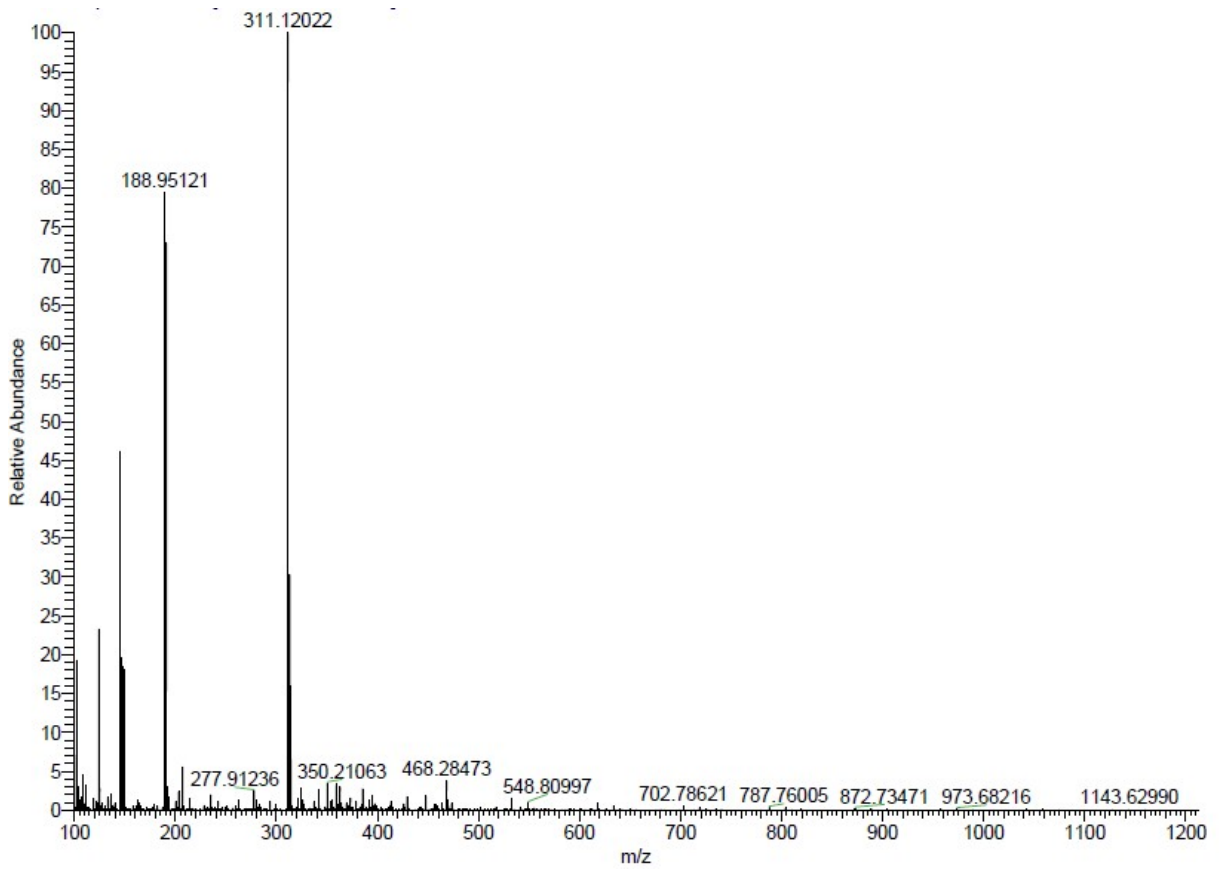

2c

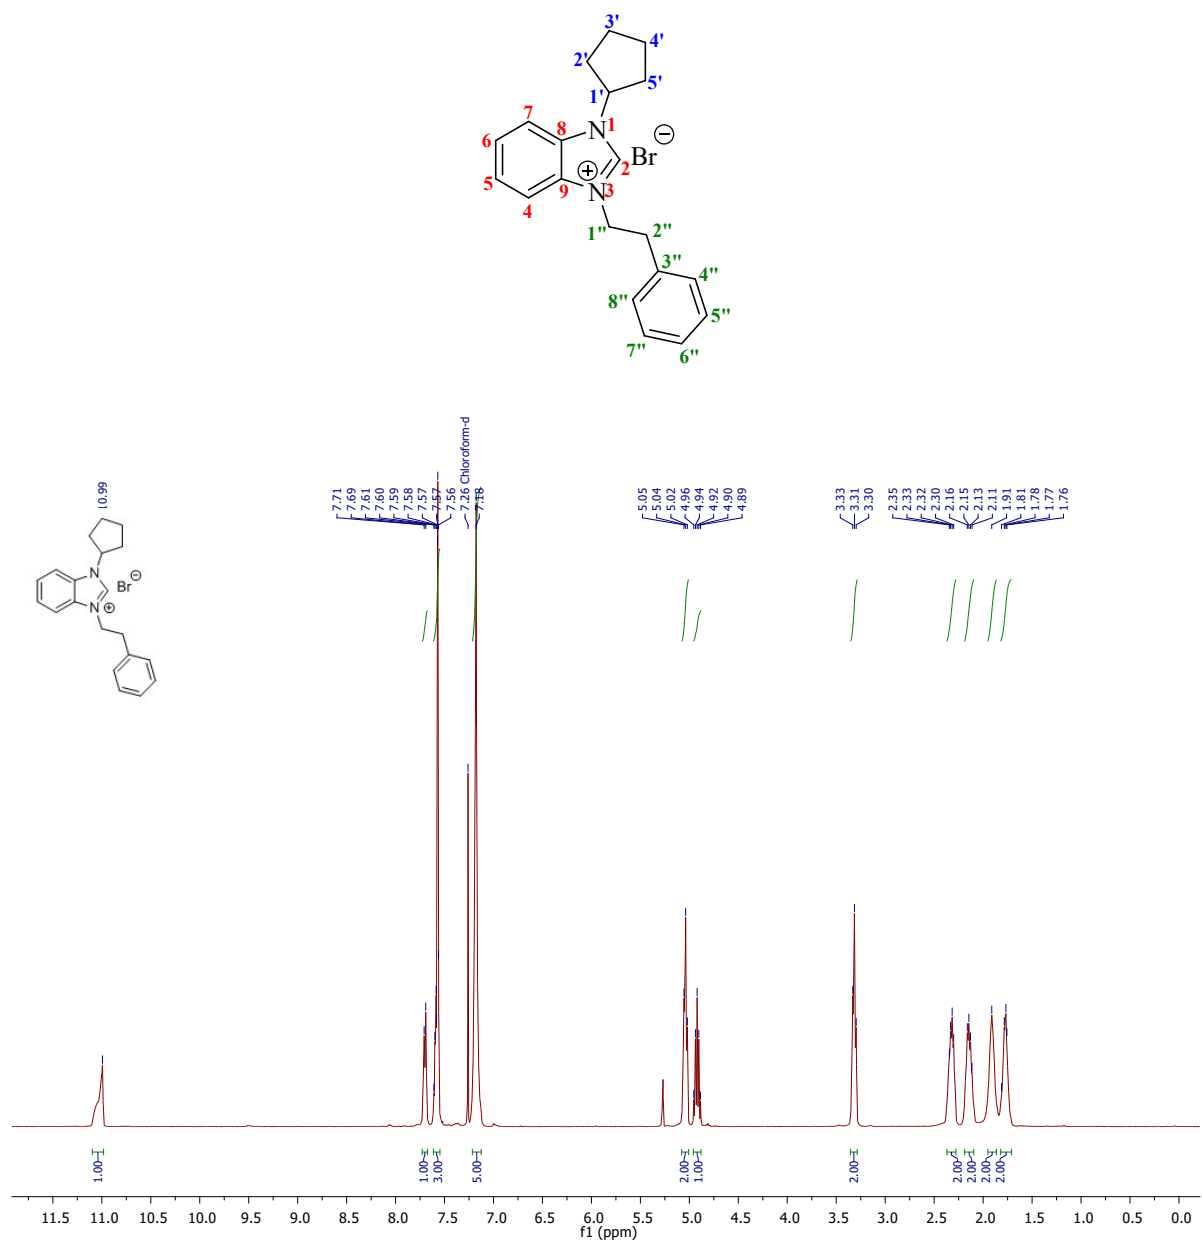

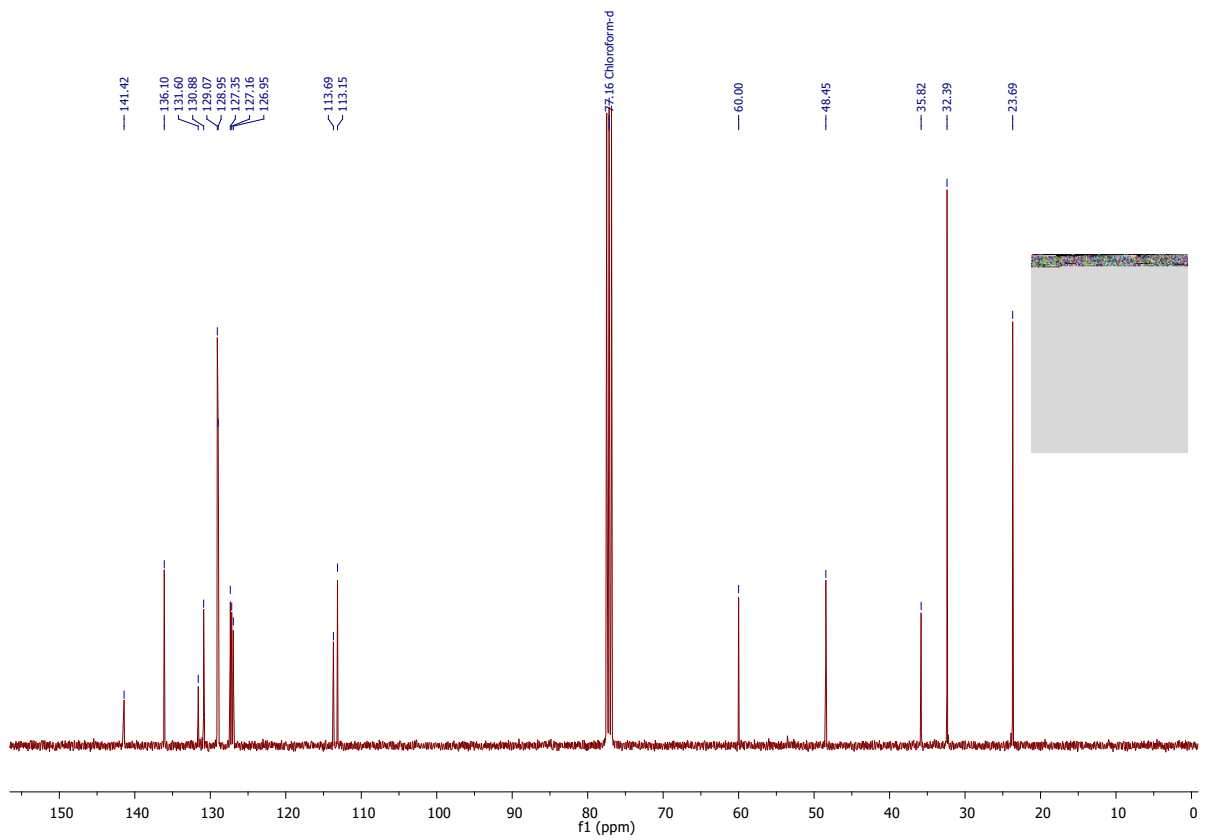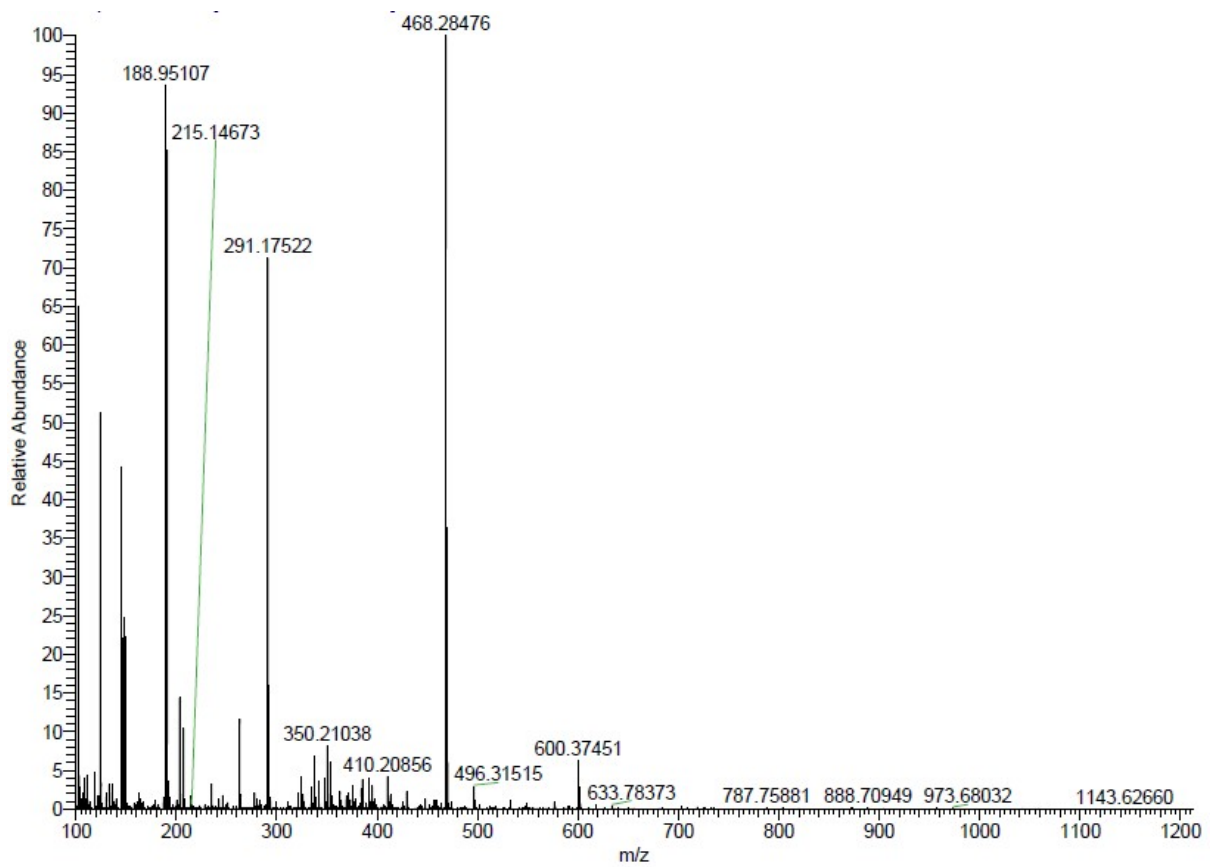

2d

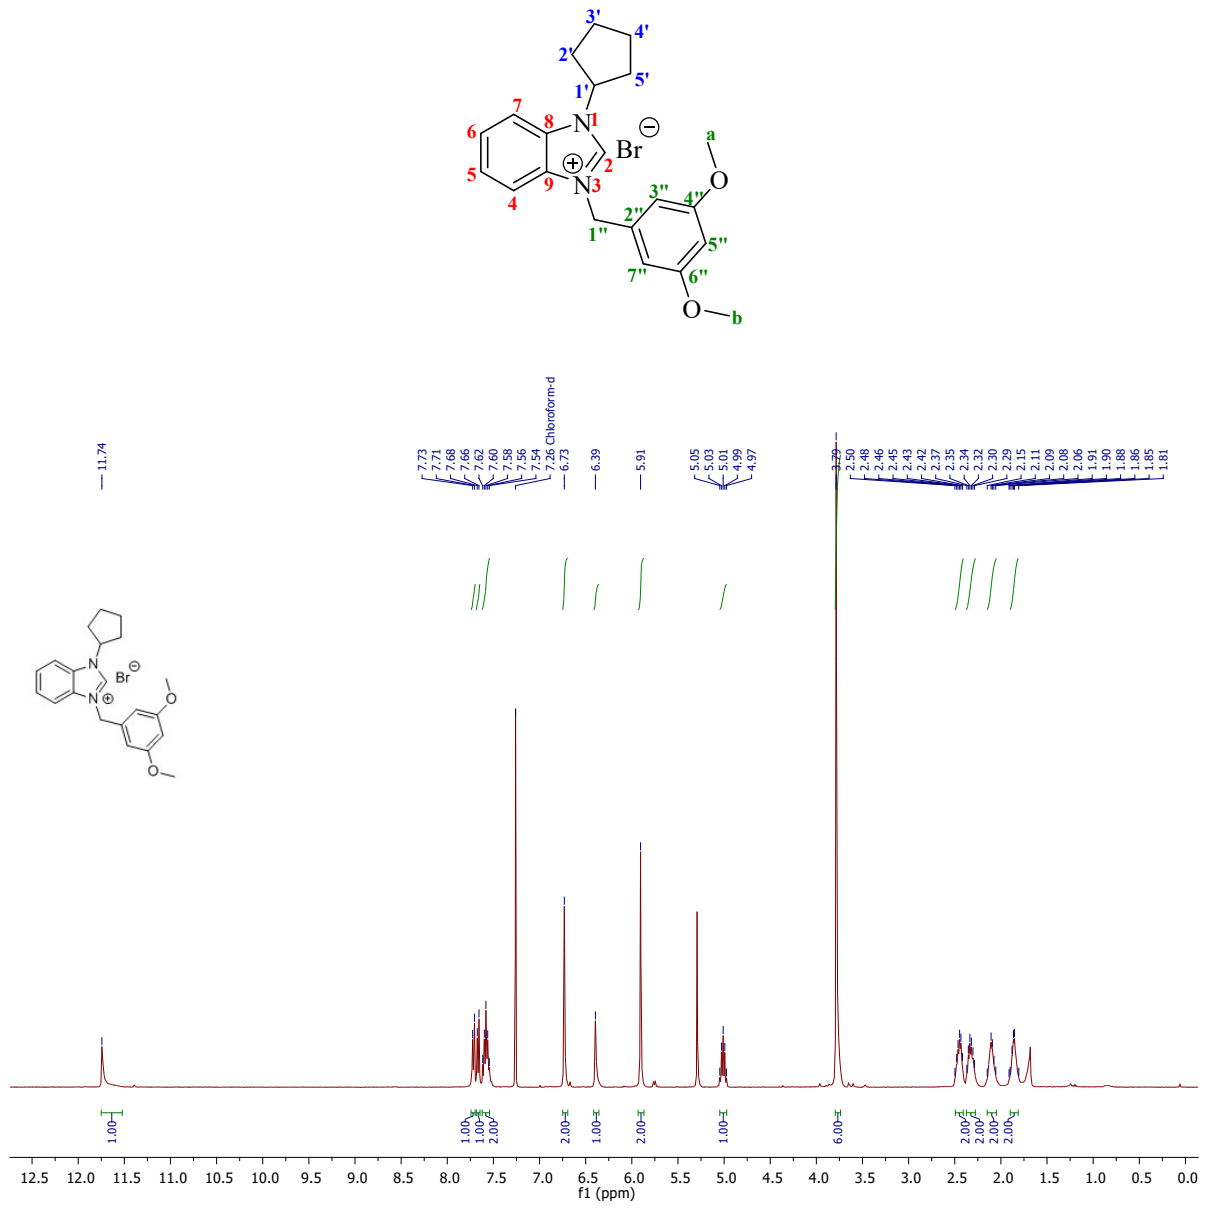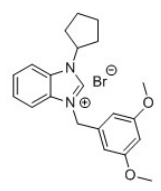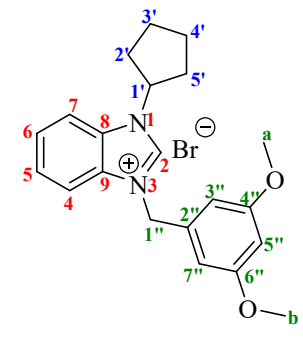

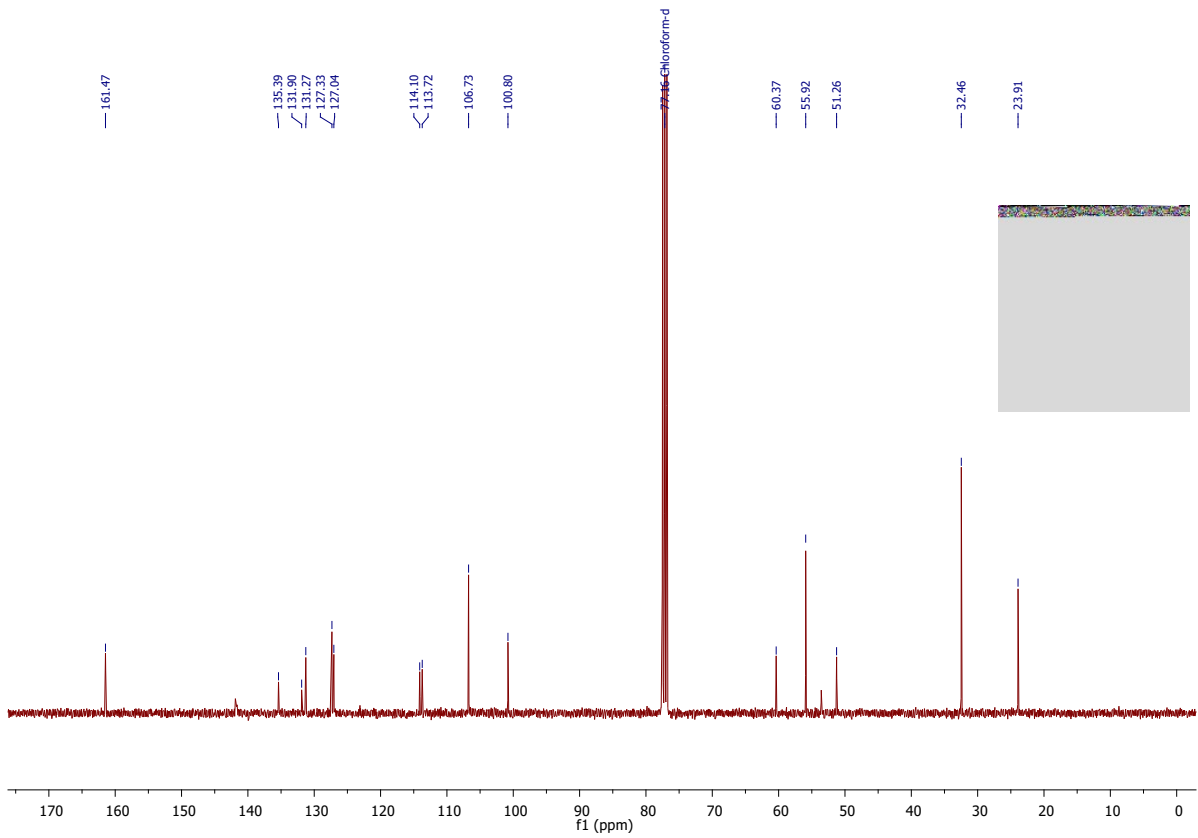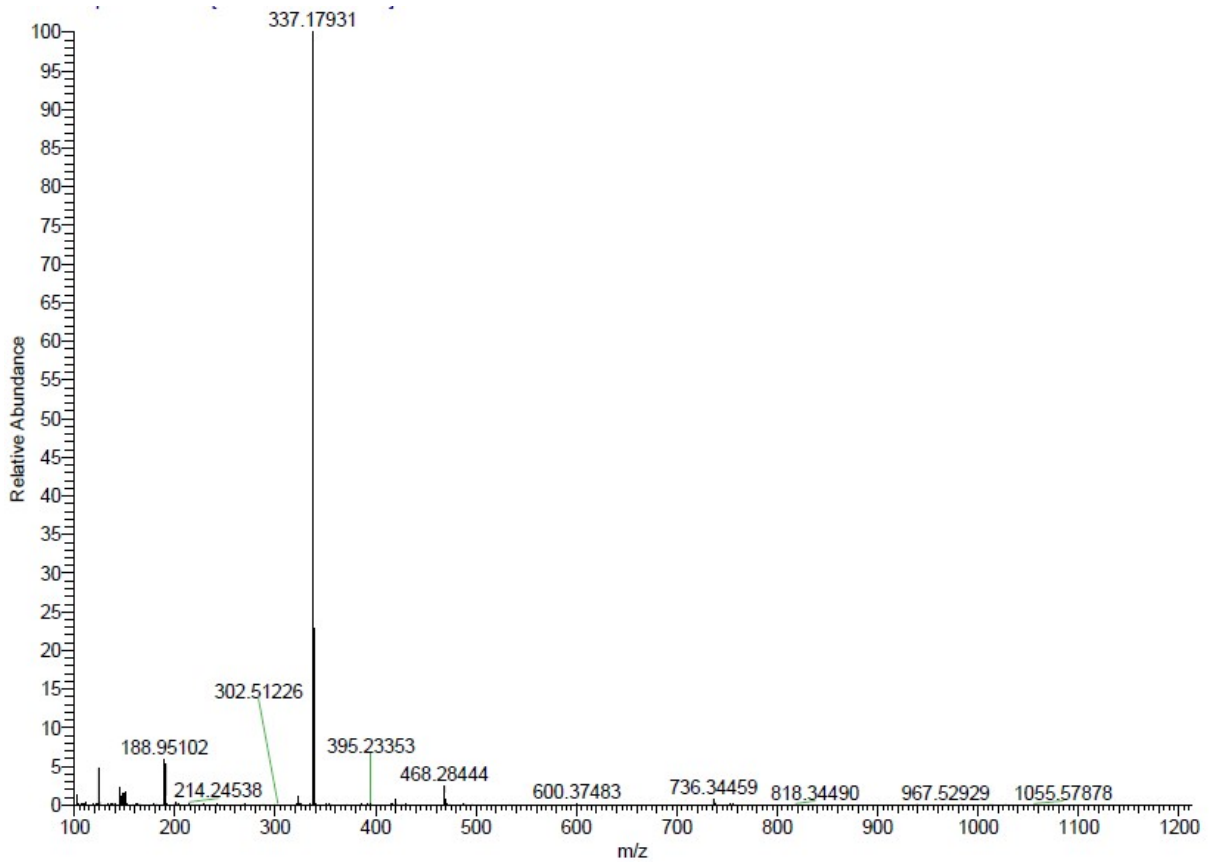

2e



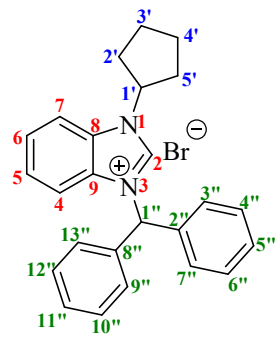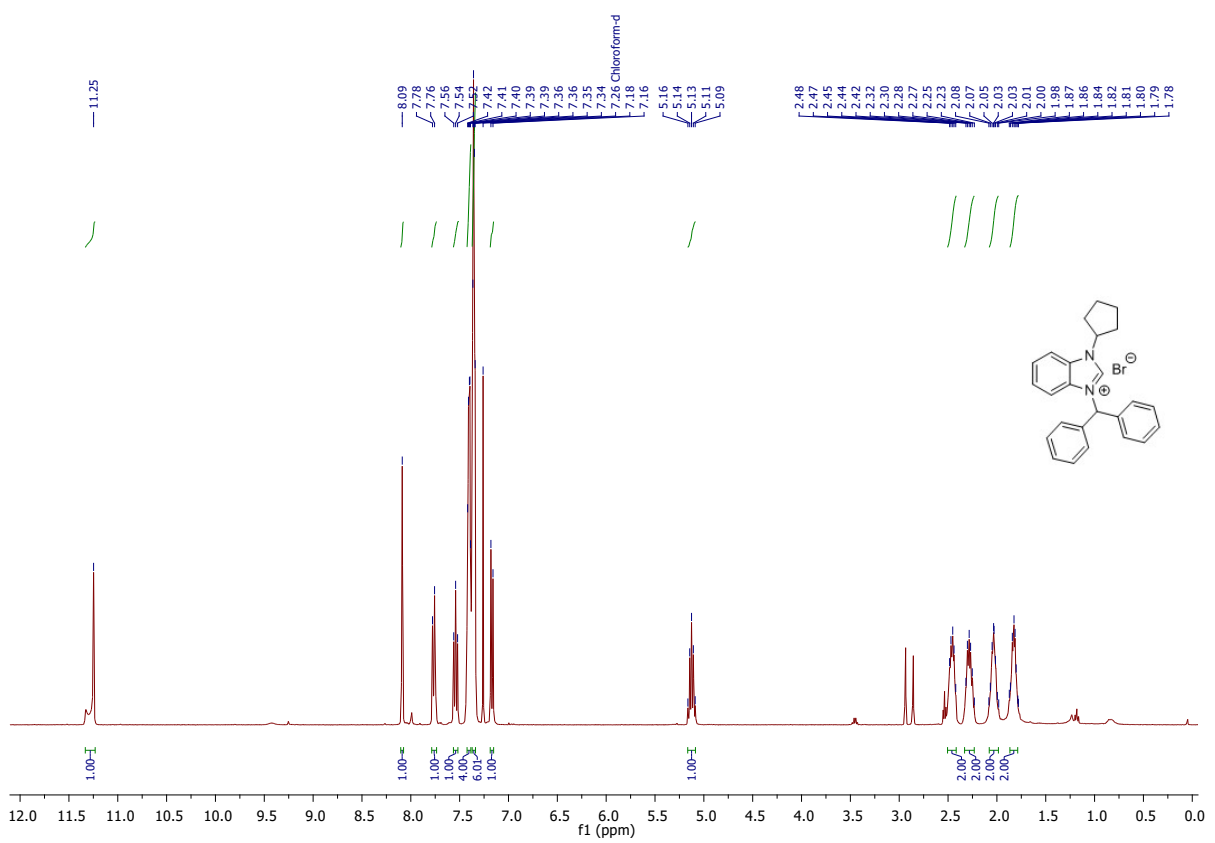

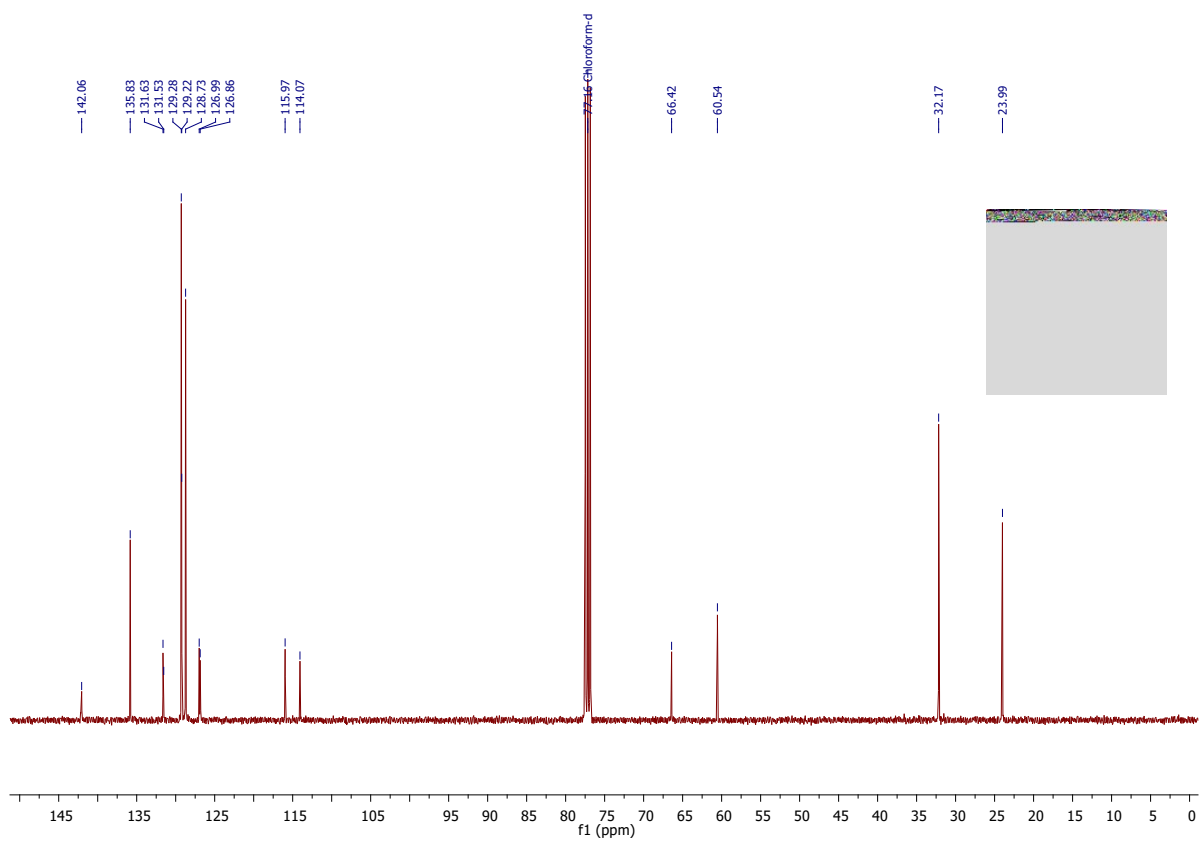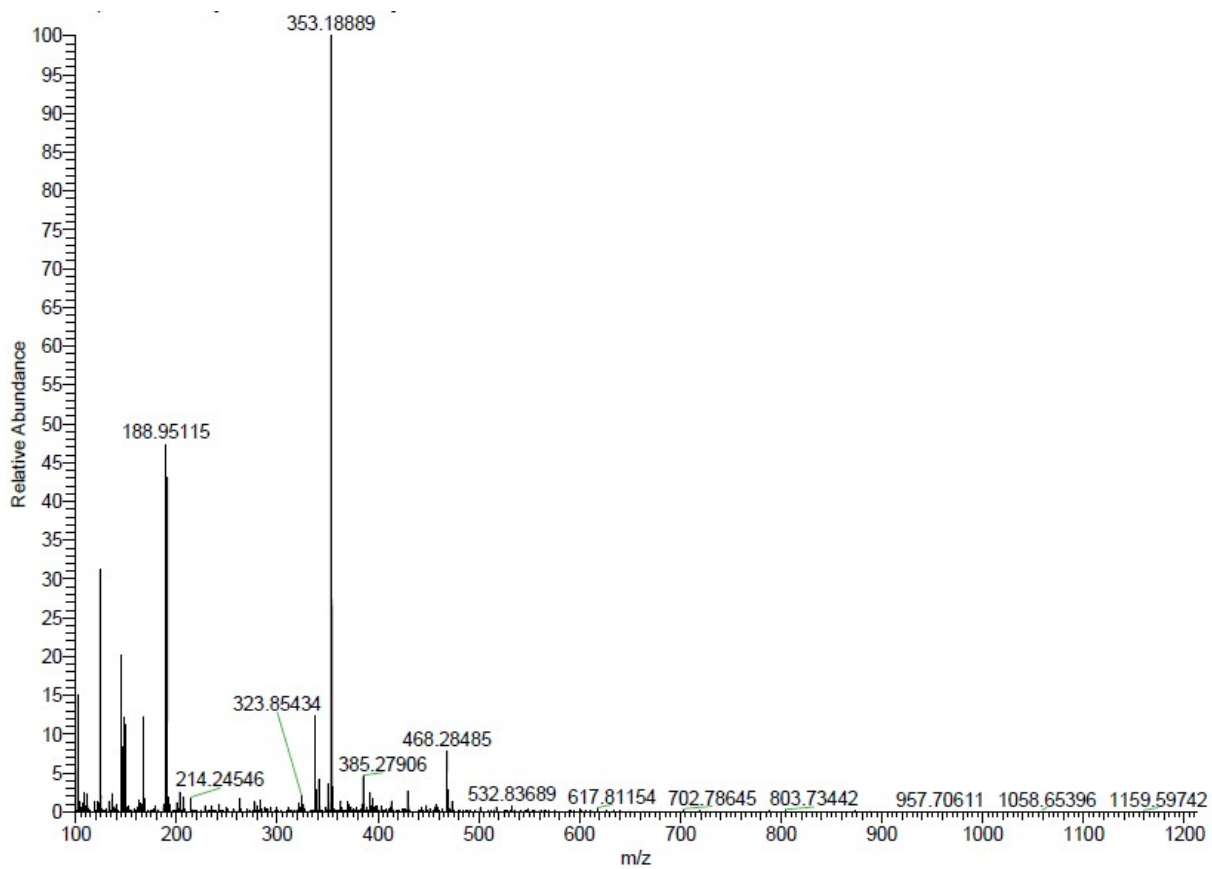

3a

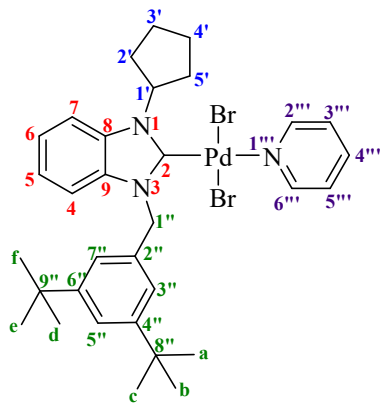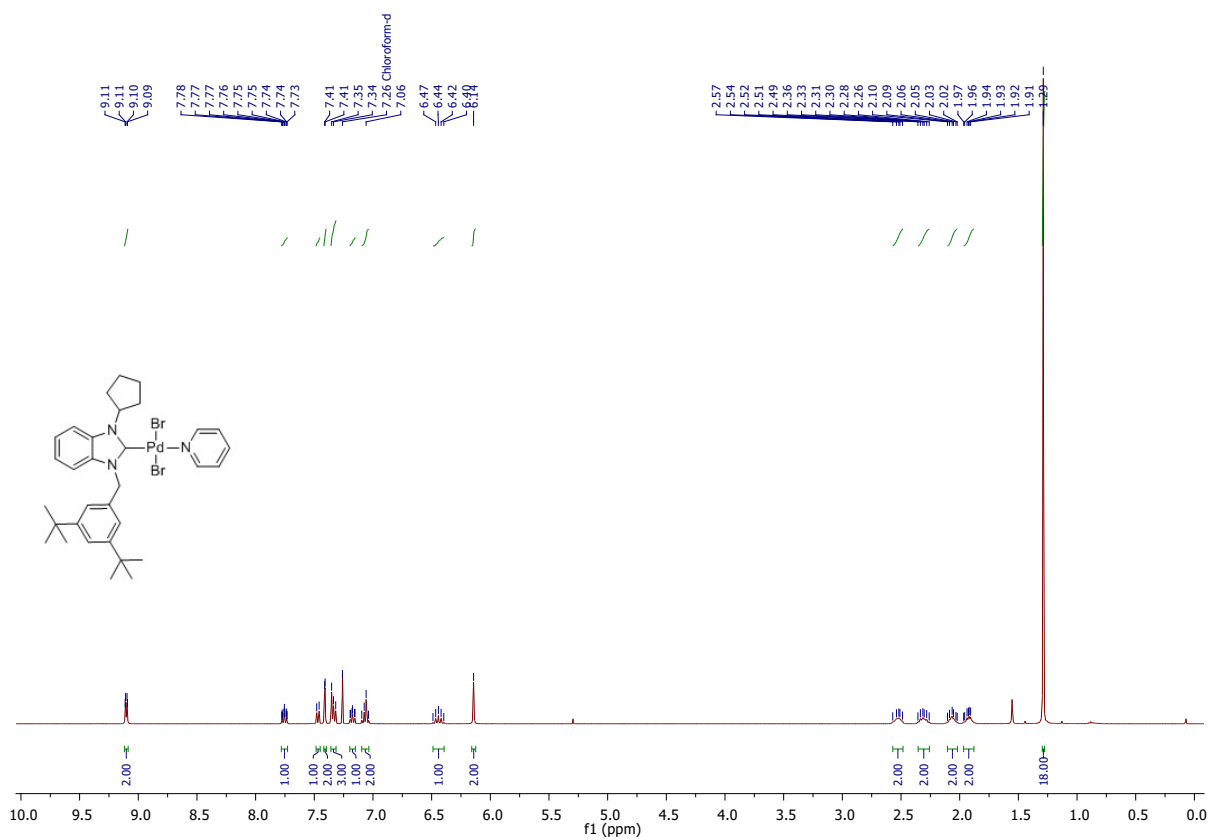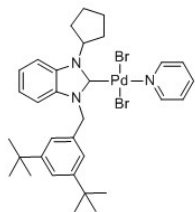

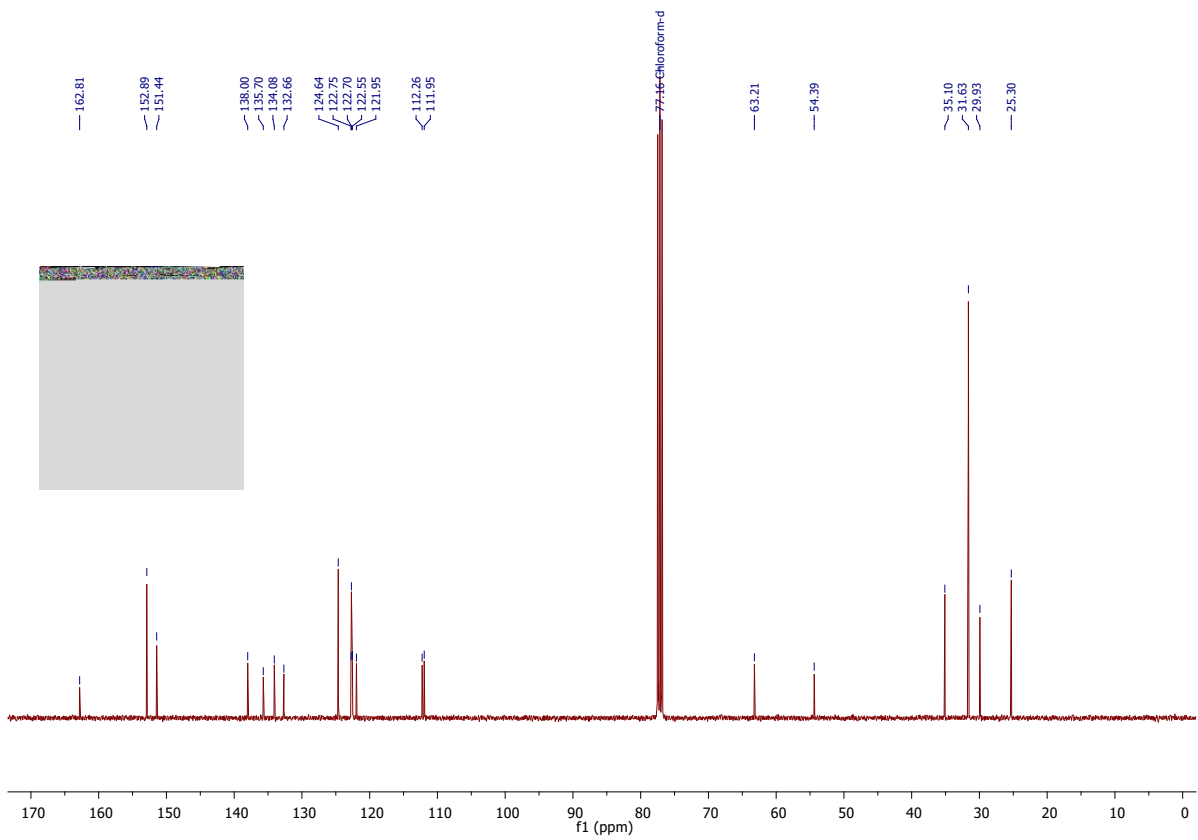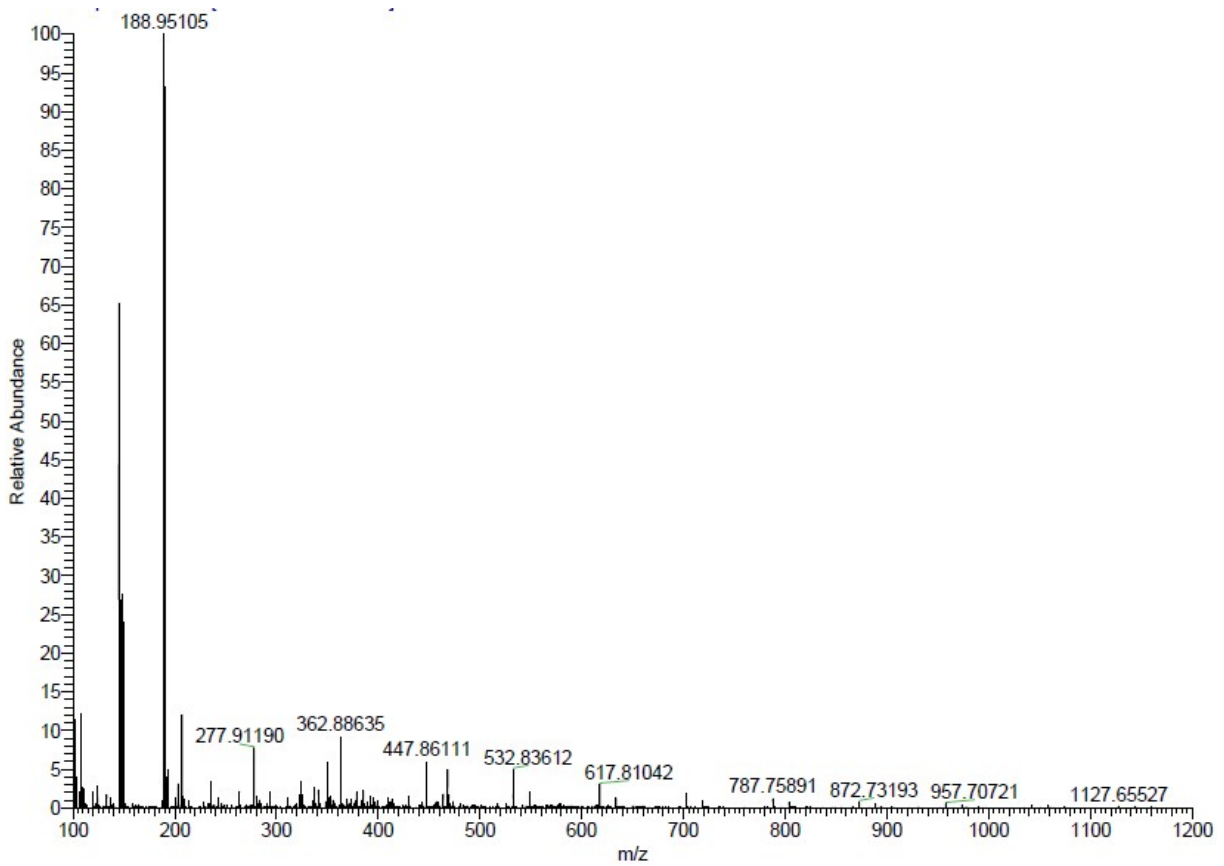

3b

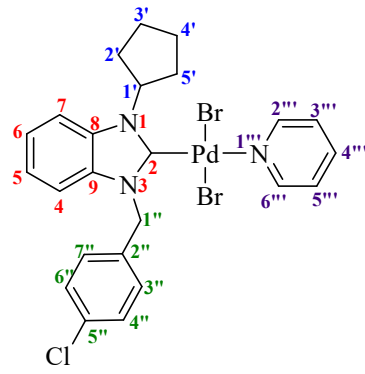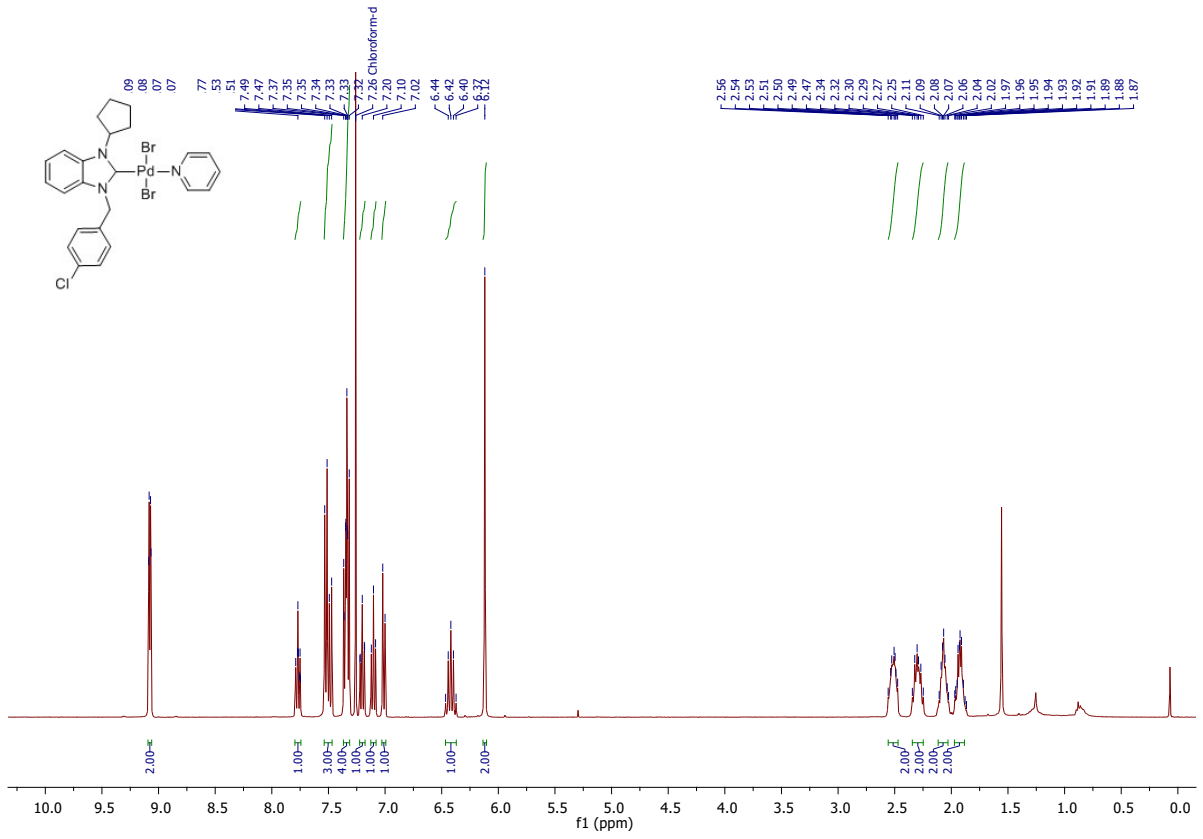

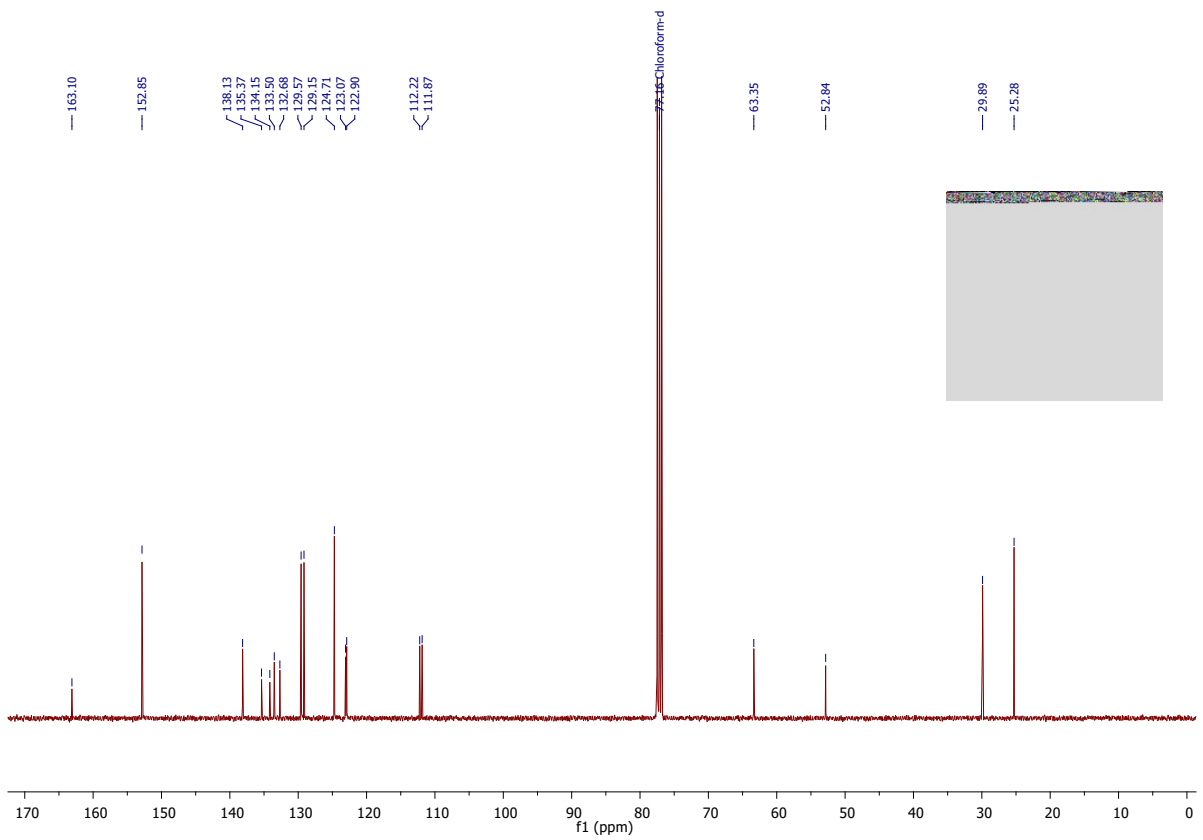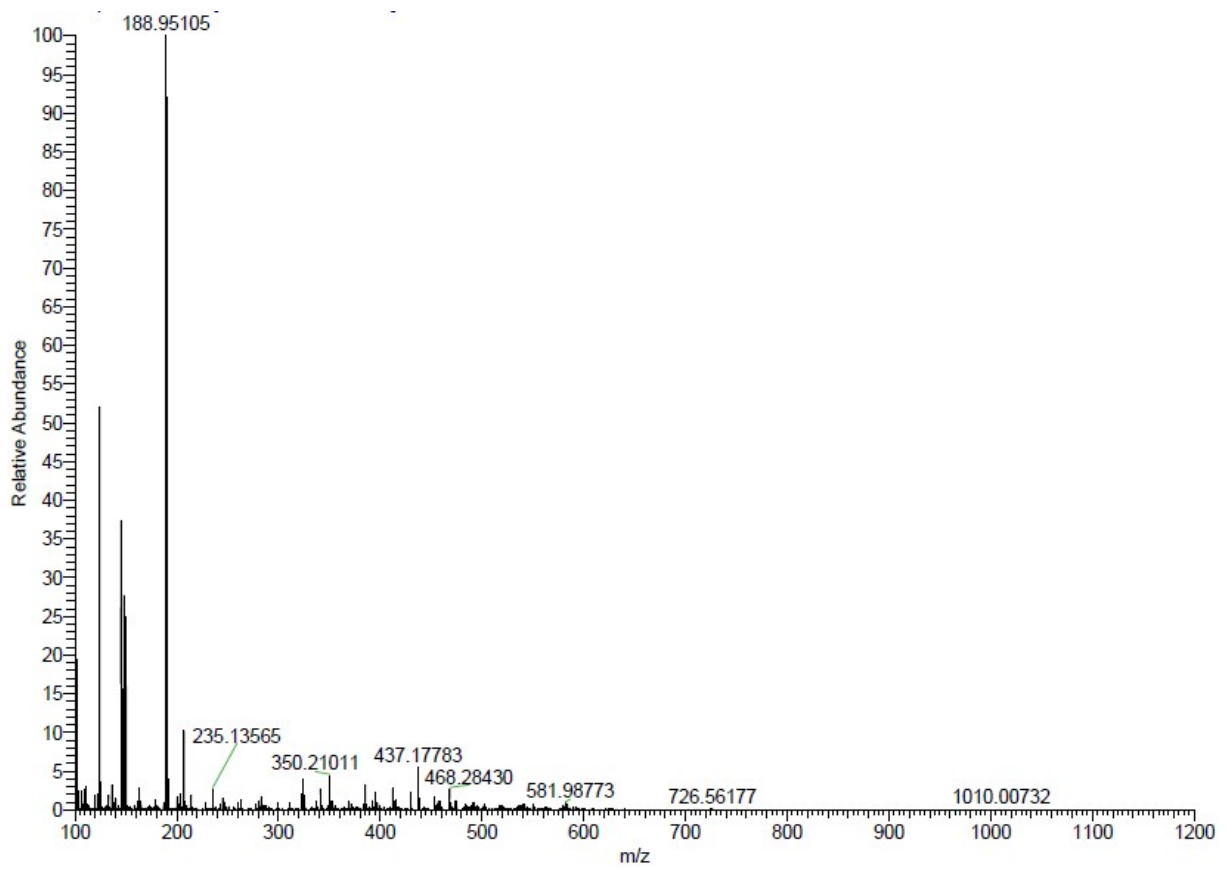

3c

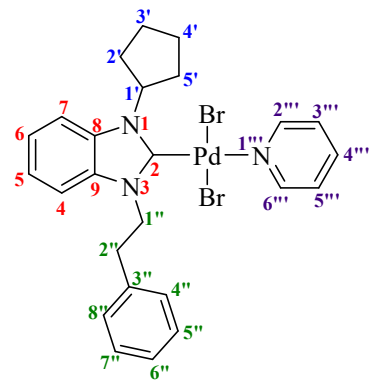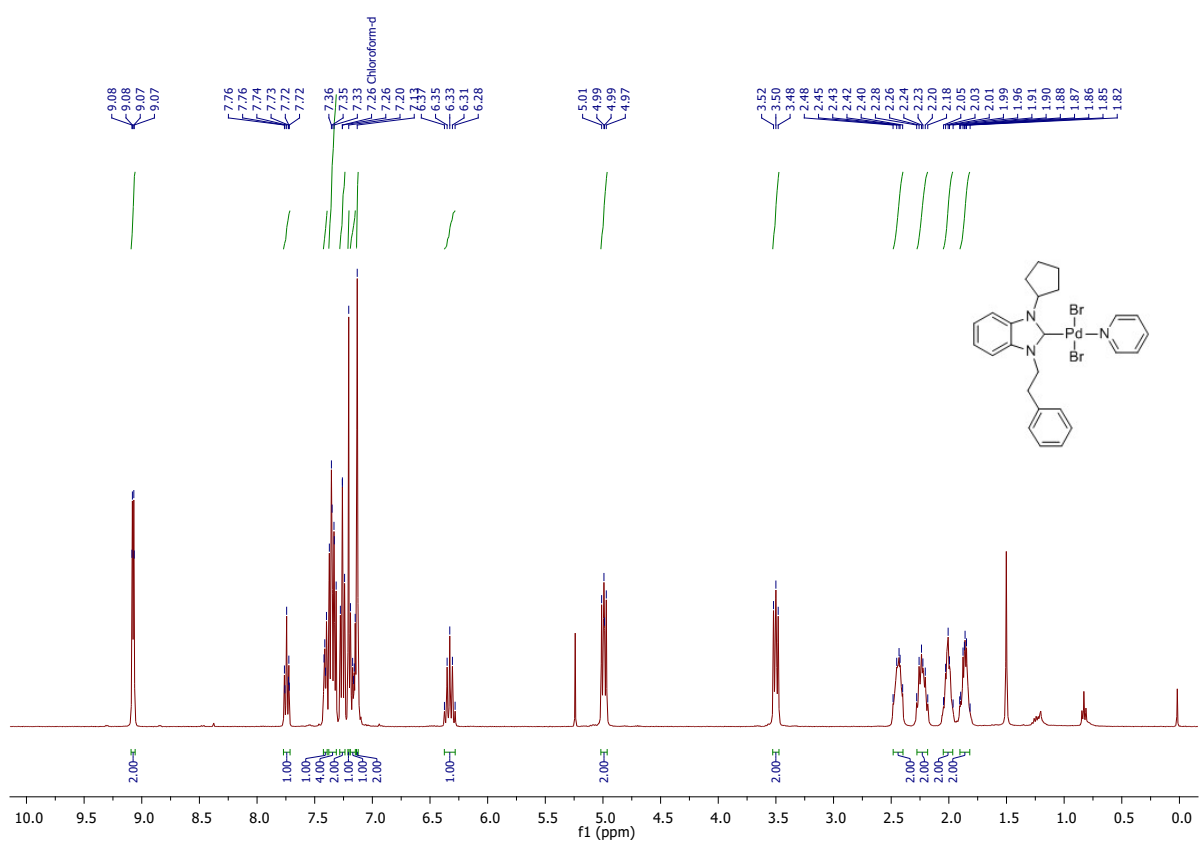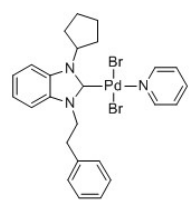

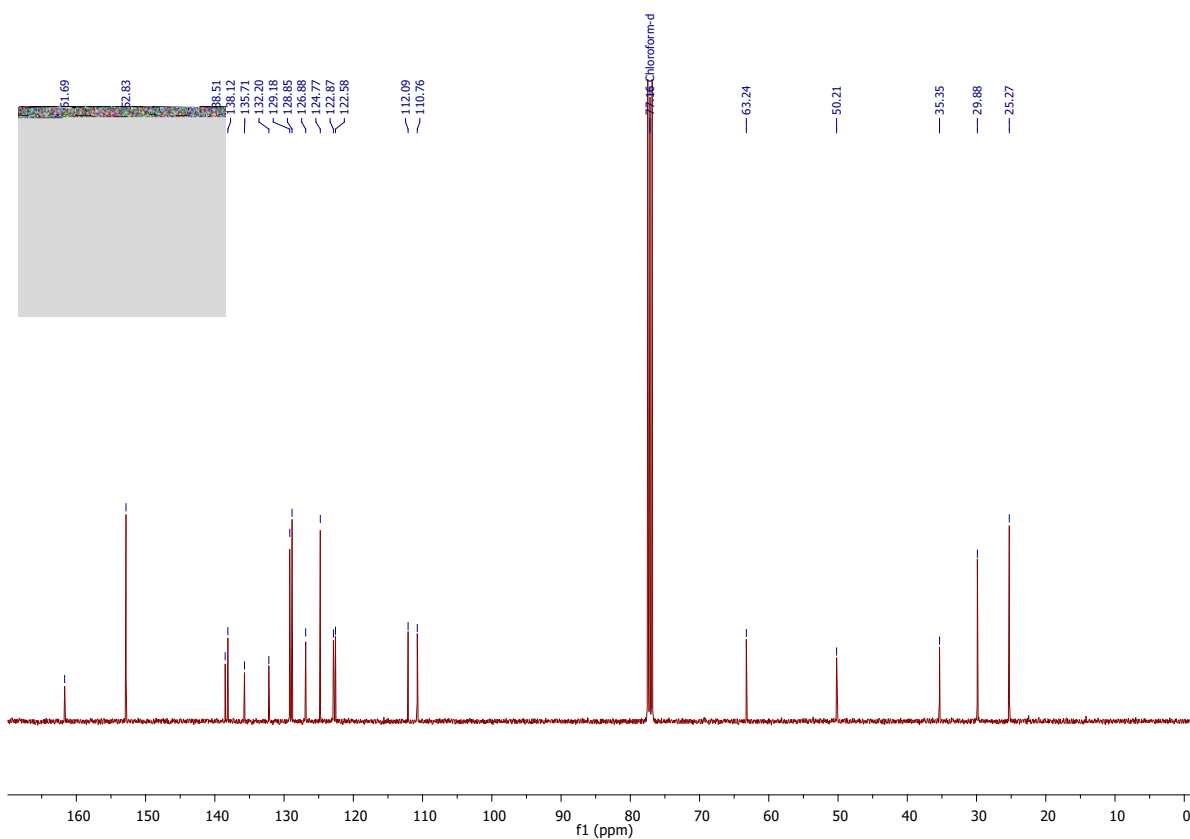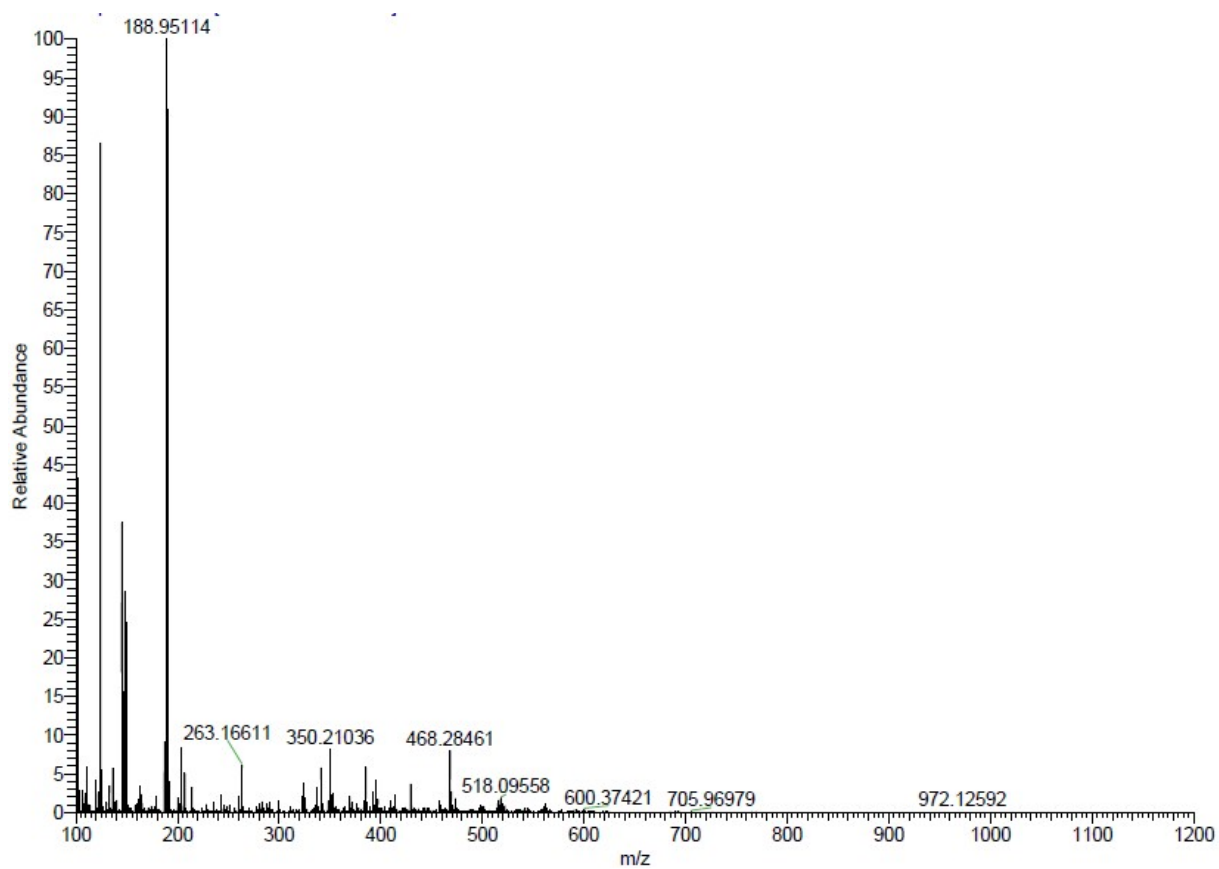

3d



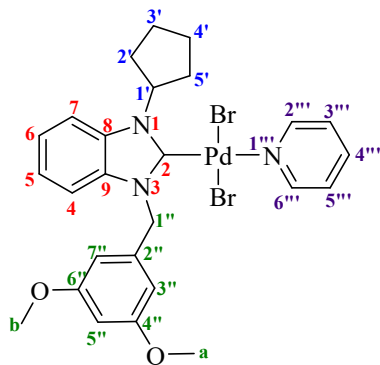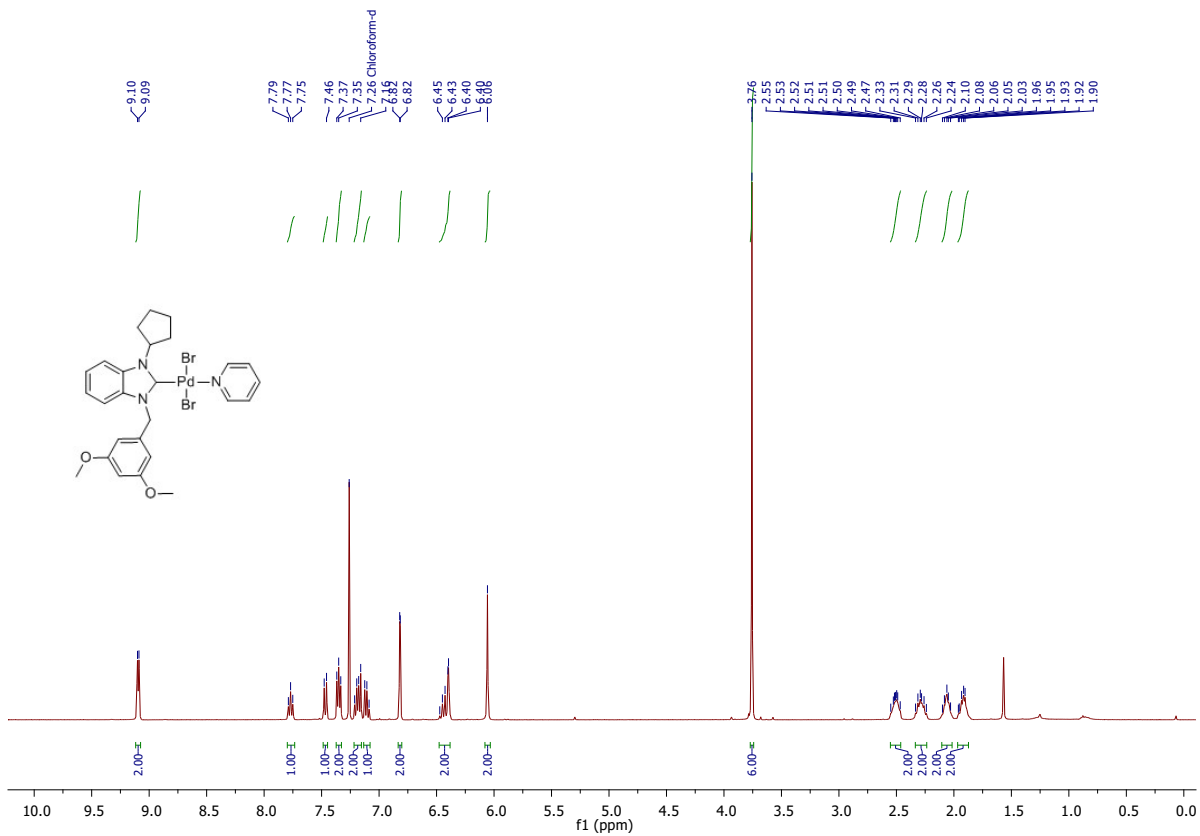

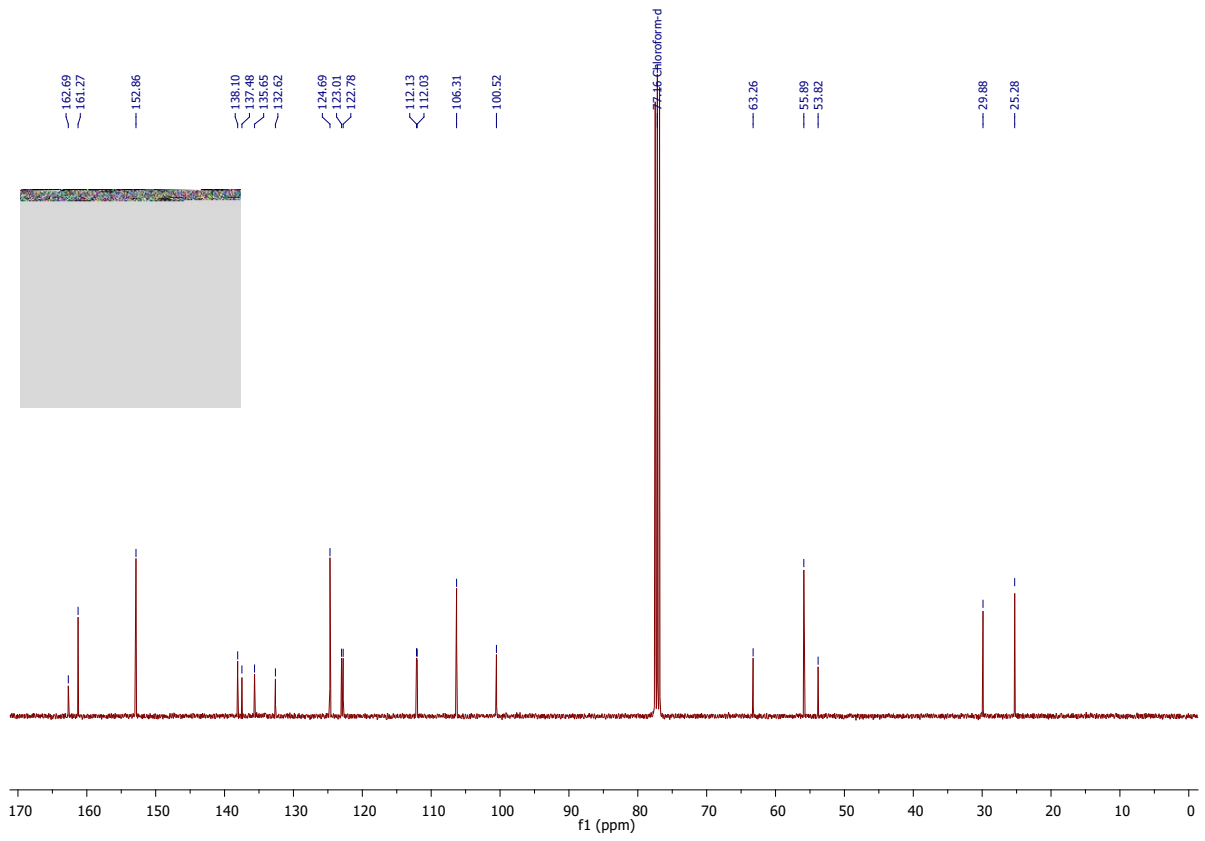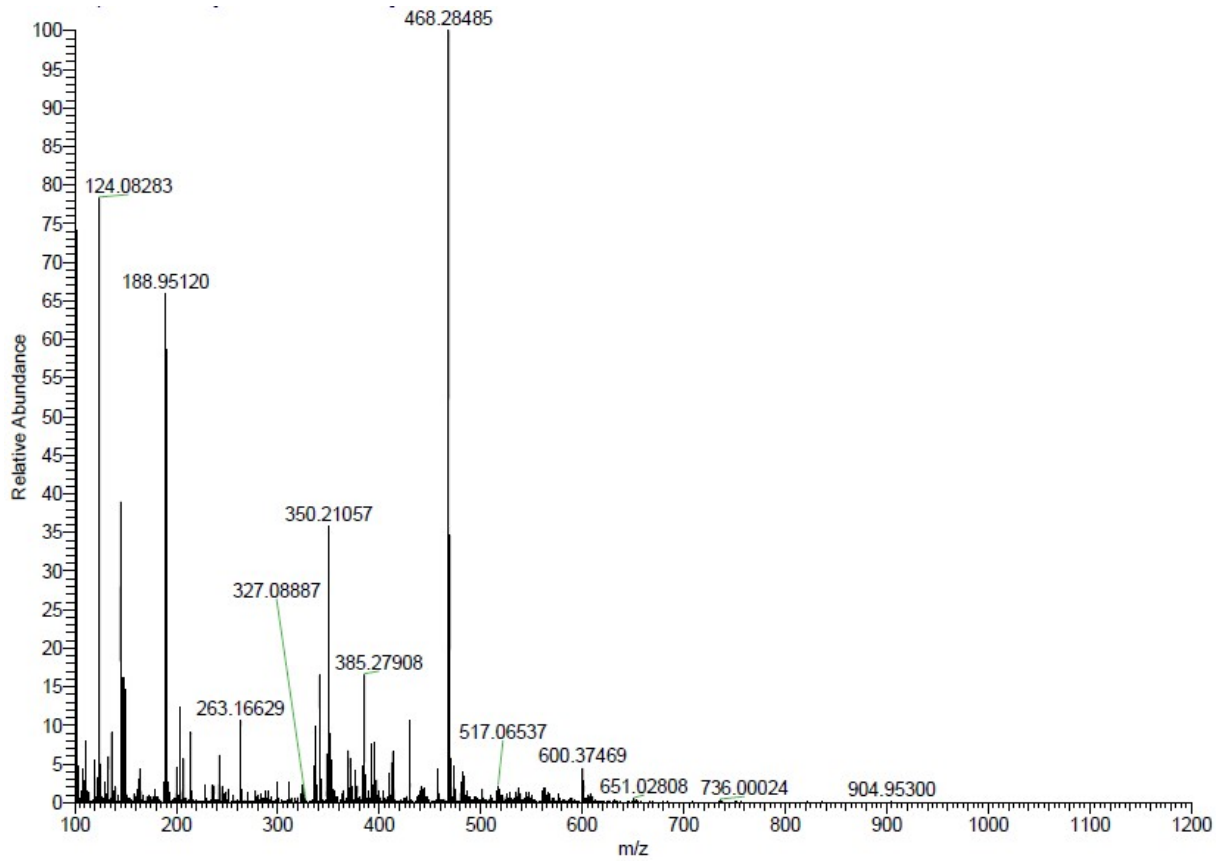

3e

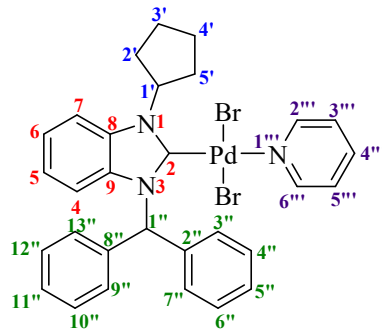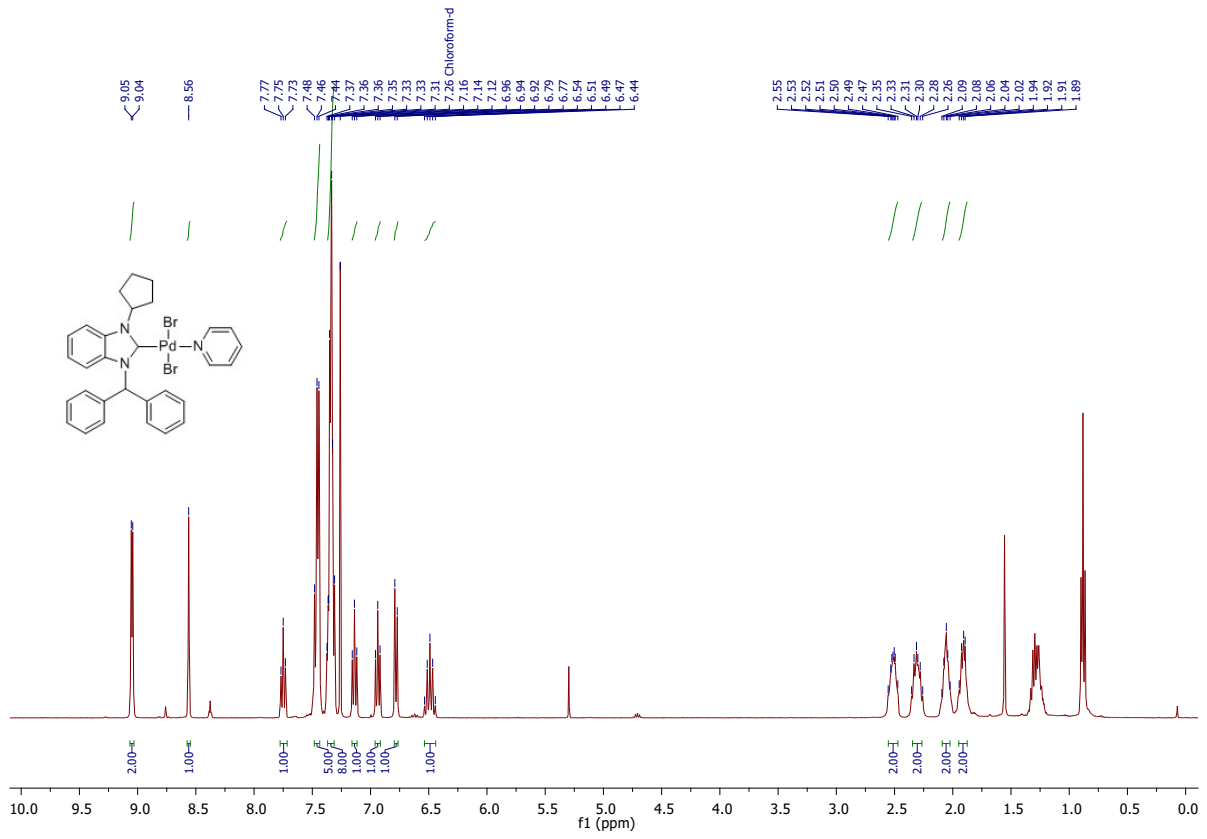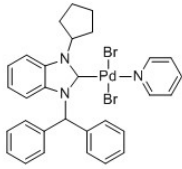

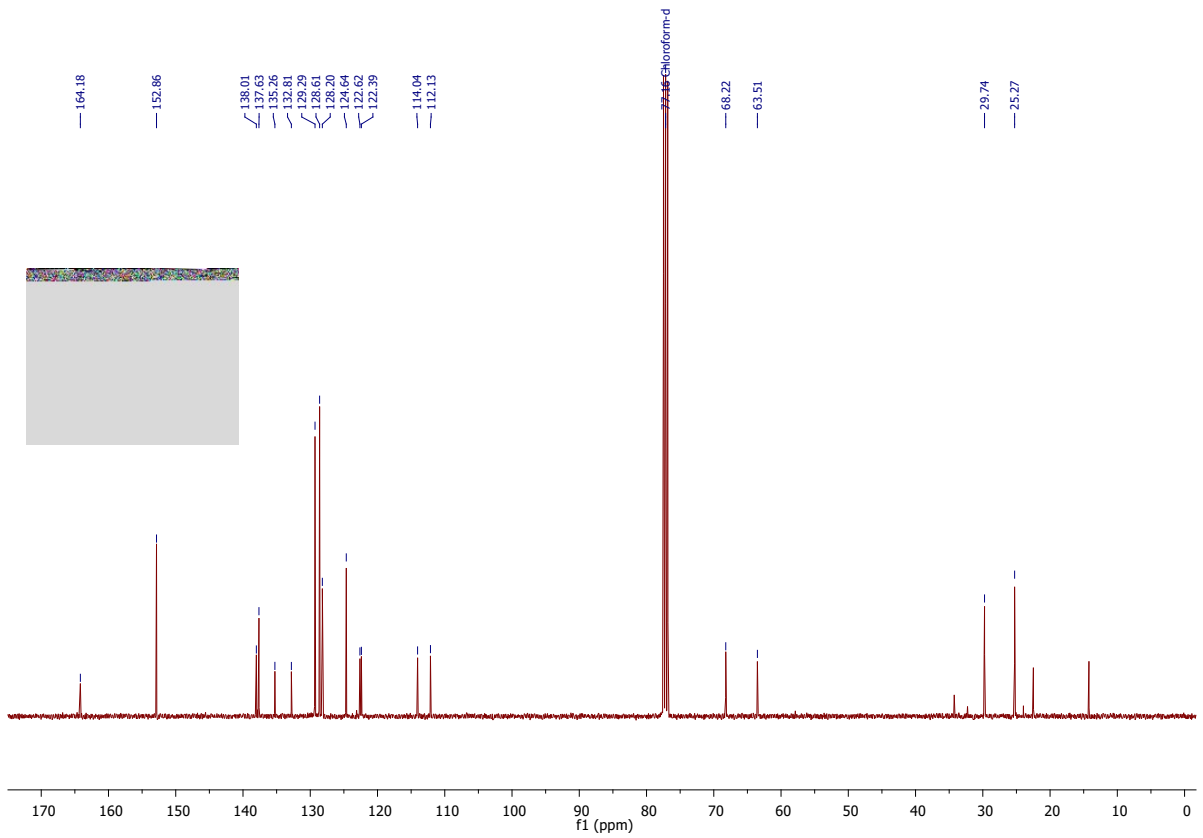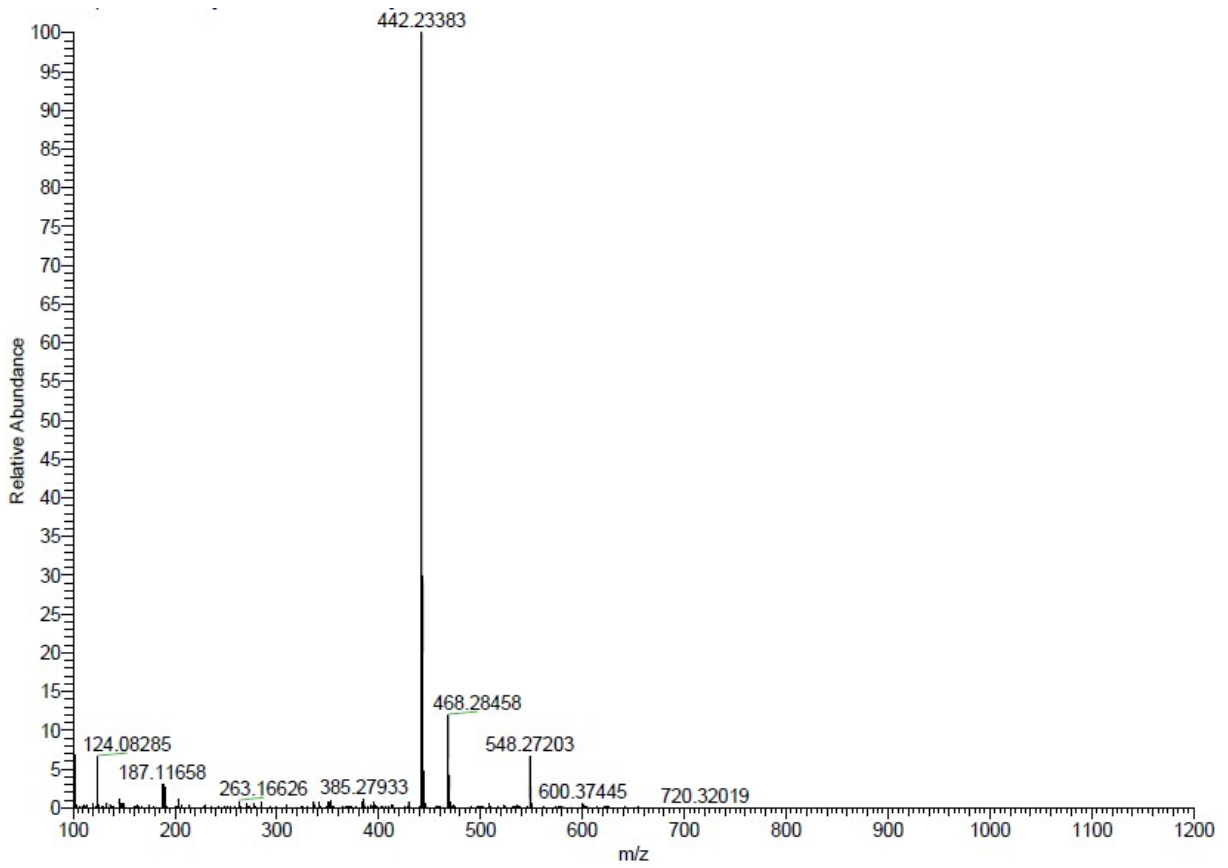

2a

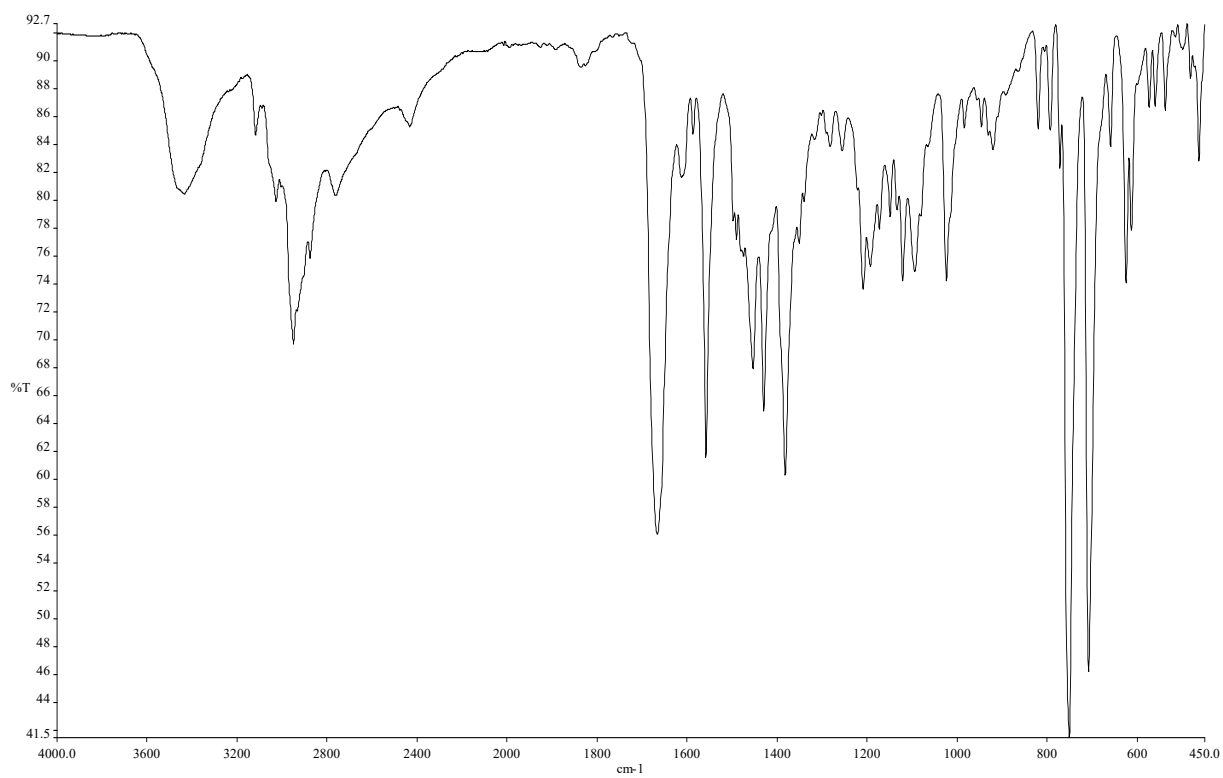

2b

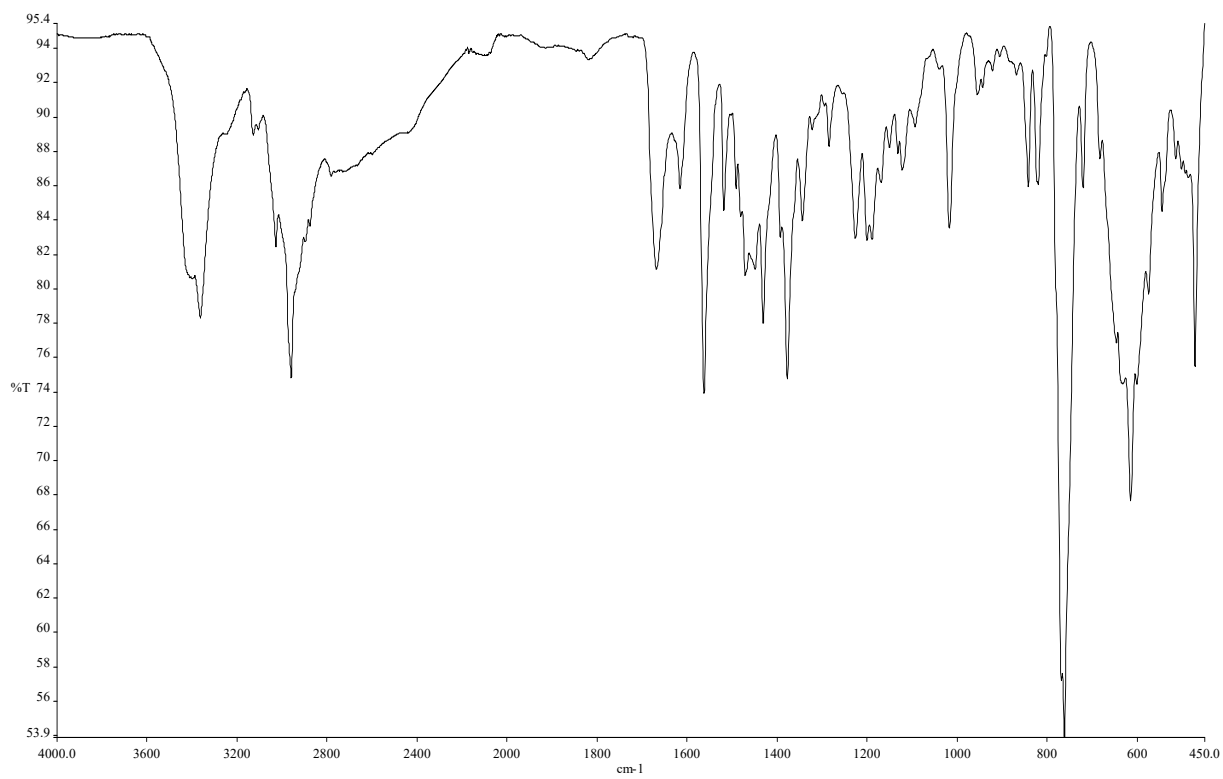

2c

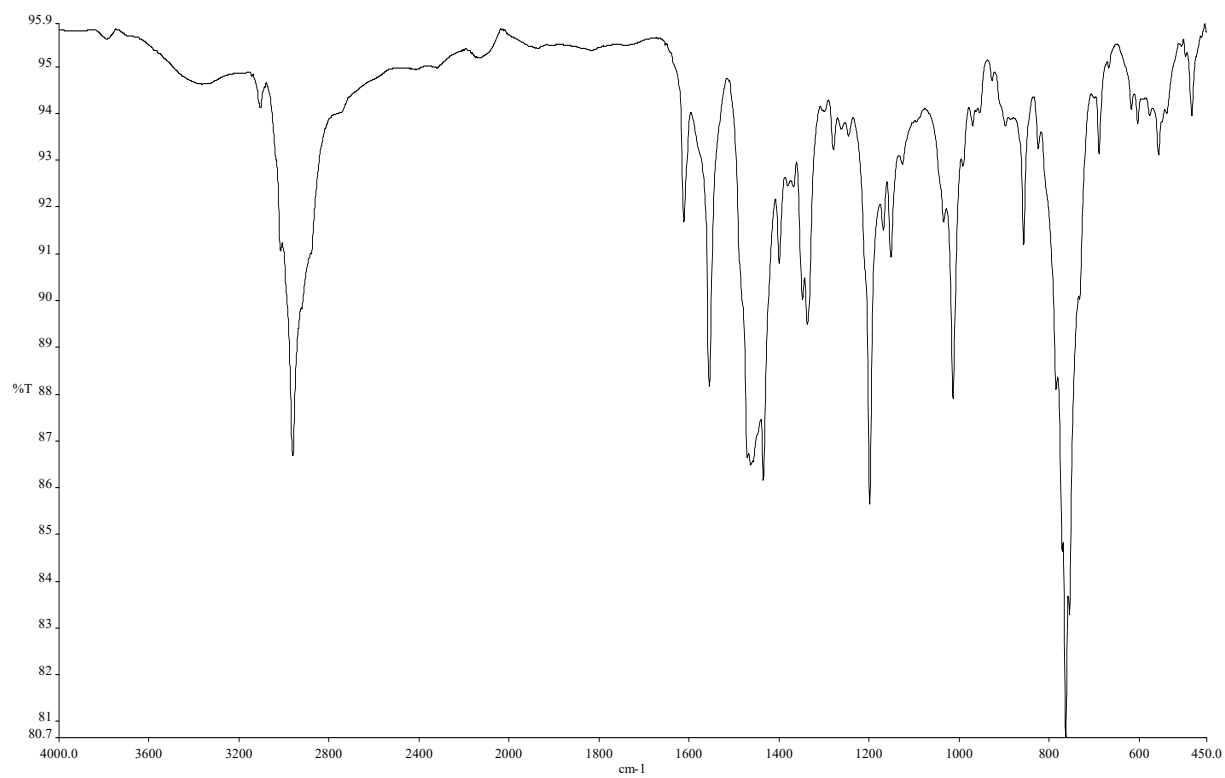

2d

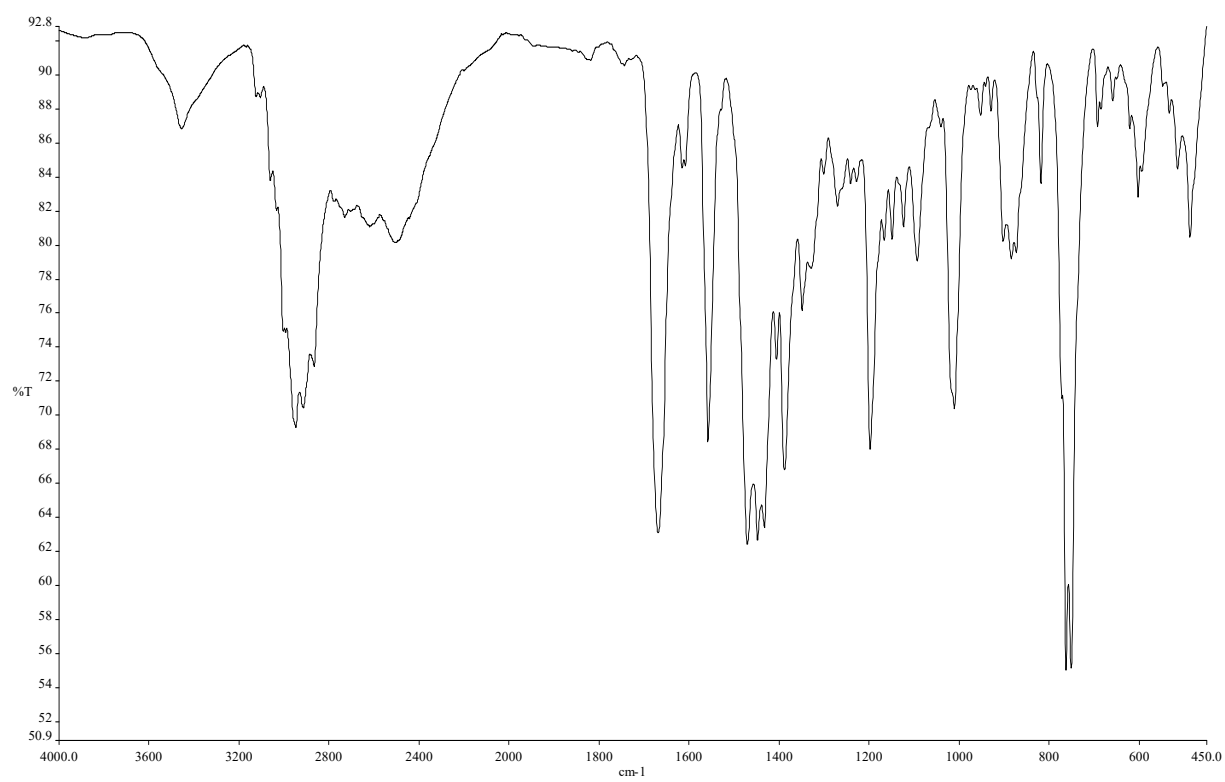

2e

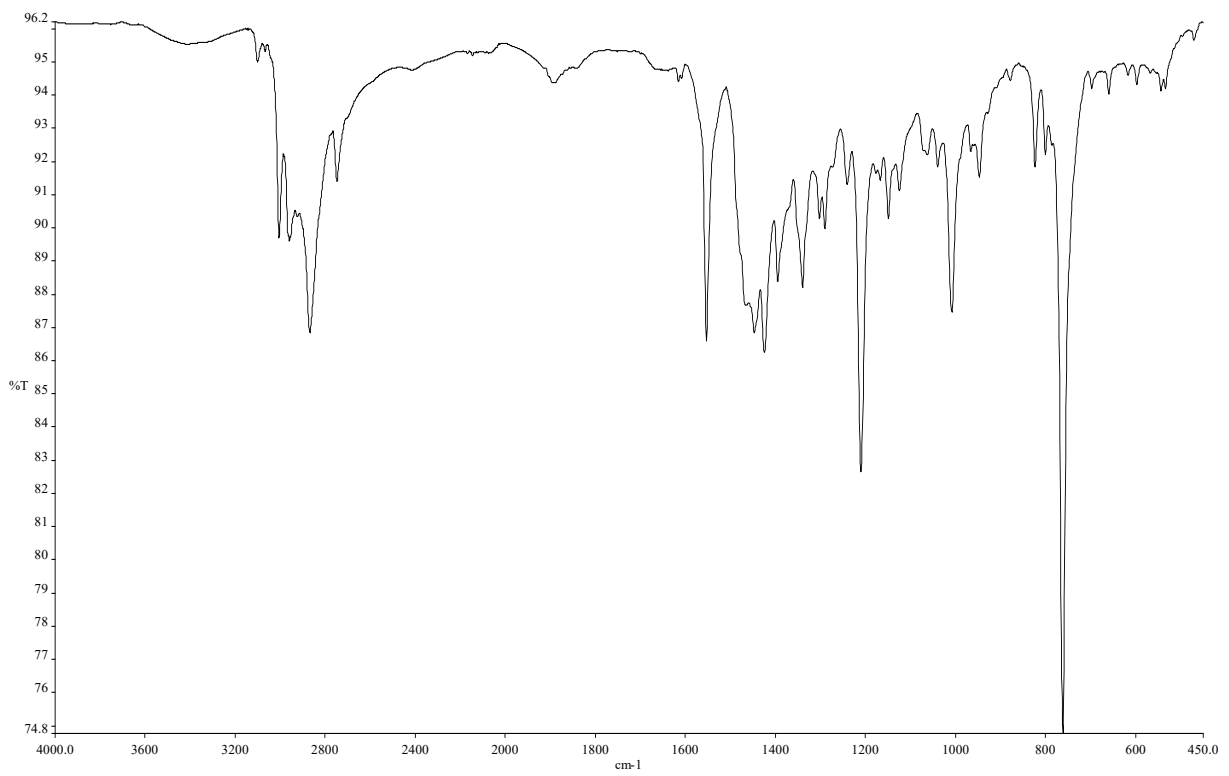

3a

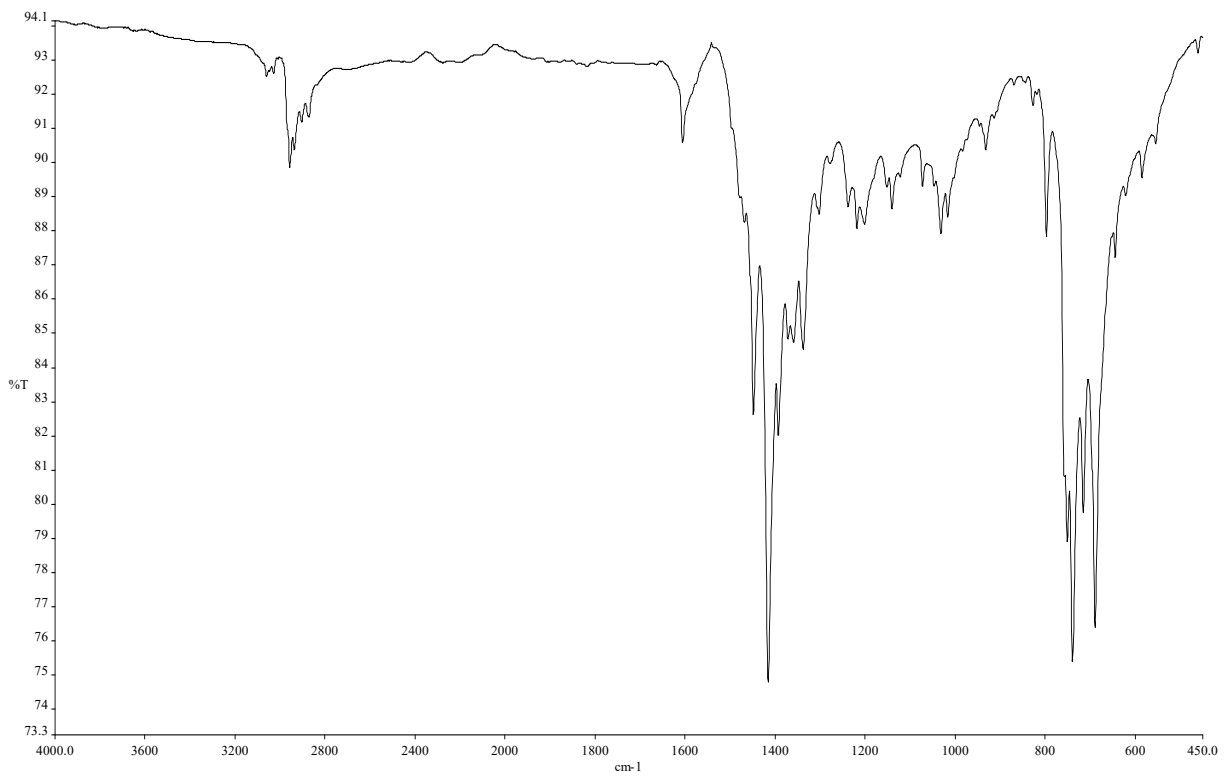

3b

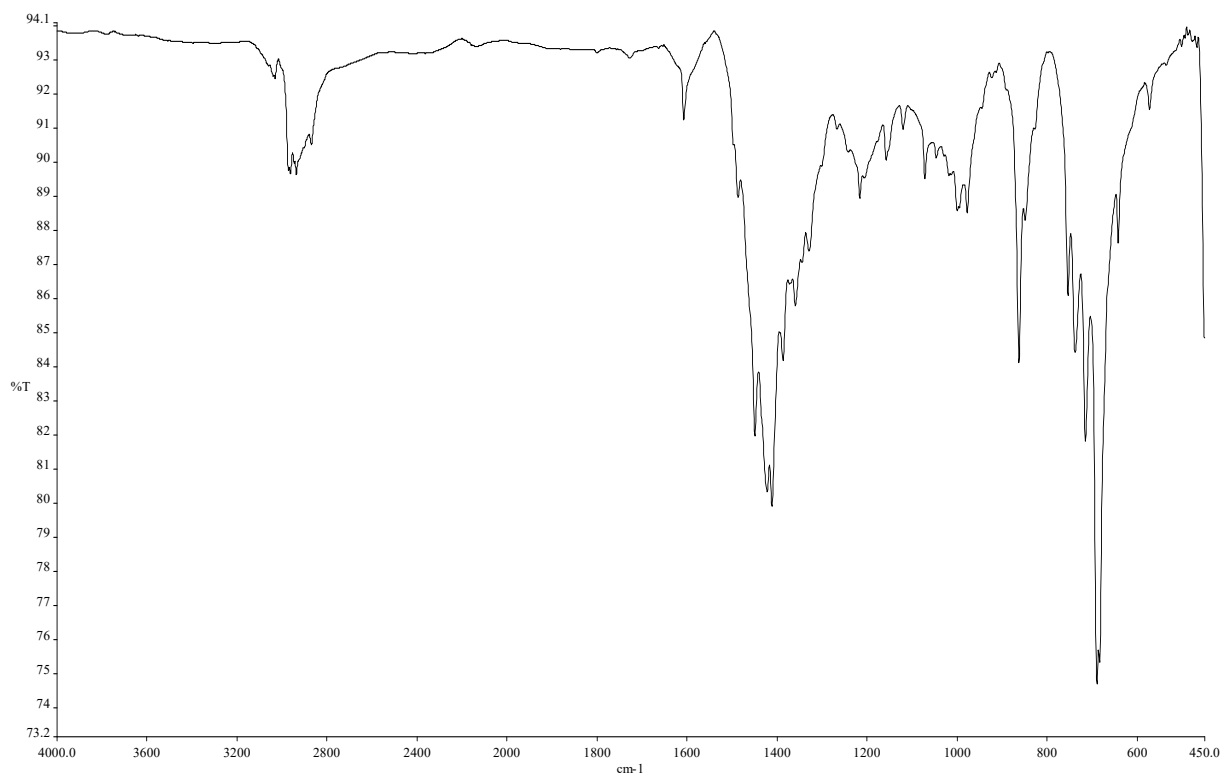

3c

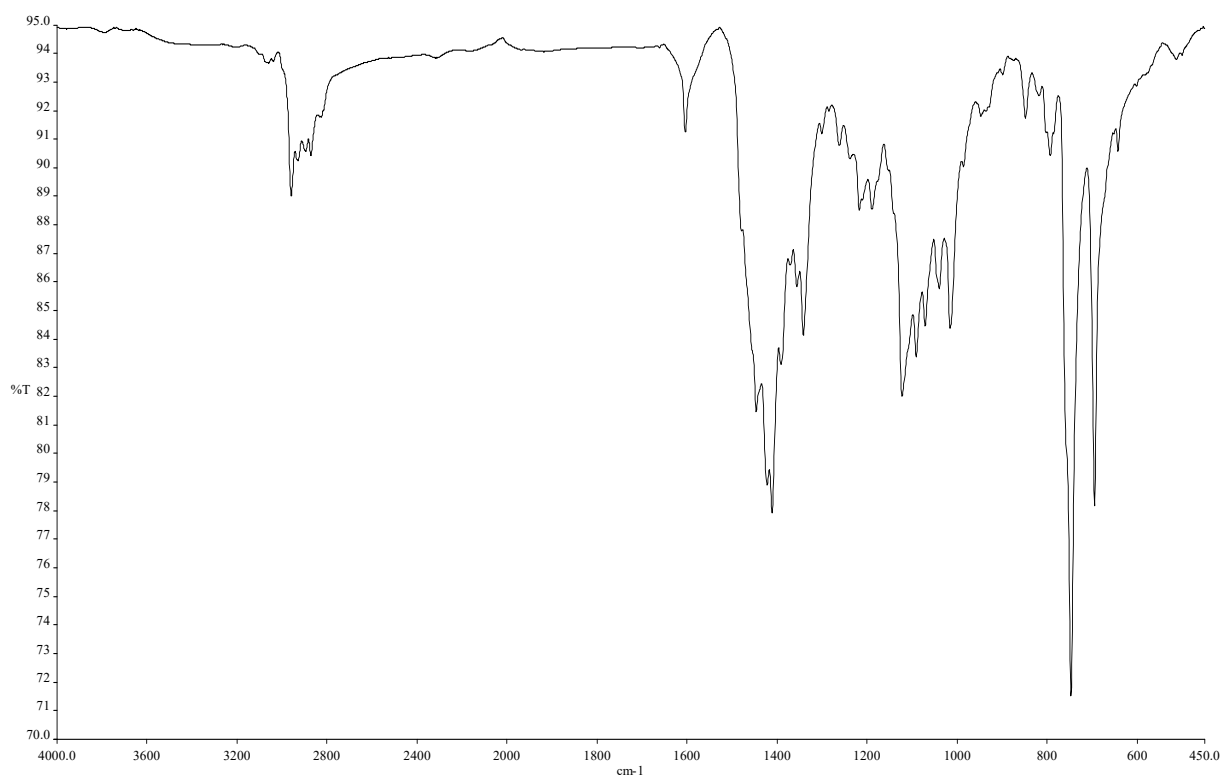

3d



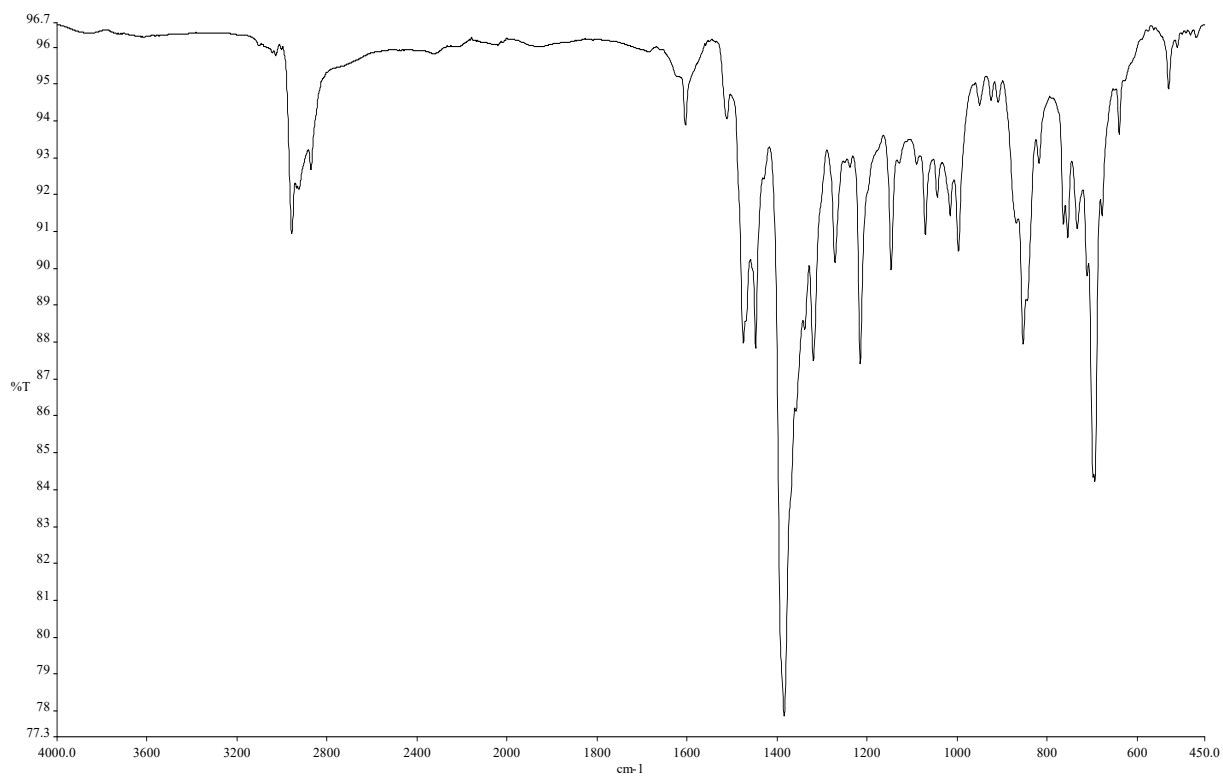

3e

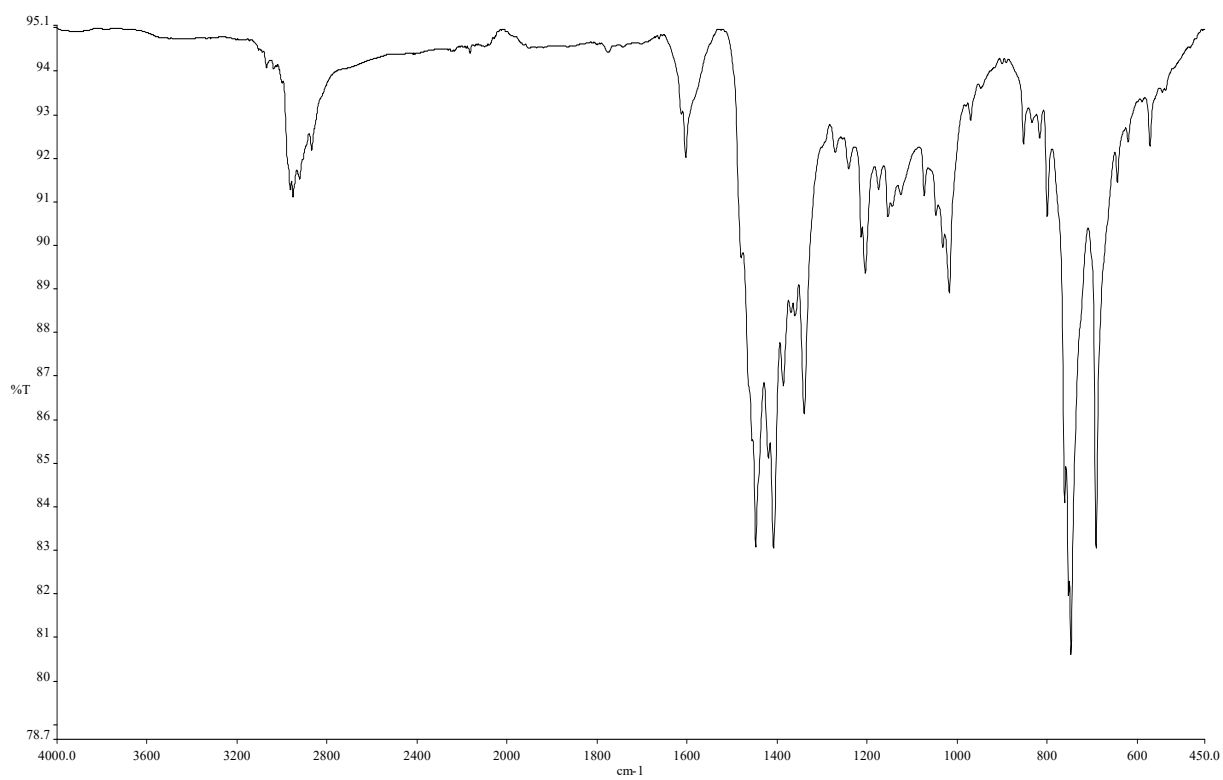

Supplement: d3nj04209j1.pdf [file d3nj04209j1.pdf]
